# Supplementary material
Source: publisher figshare collection journal article supplement (https://acs.figshare.com/ndownloader/files/3873922)

## Supporting Information

### Flow Update for the Carbonylation of 1-Silyl-Substituted Organolithiums under CO Pressure

Takahide Fukuyama\*, Takenori Totoki, and Ilhyong Ryu\*

*Department of Chemistry, Graduate School of Science, Osaka Prefecture  
University, Sakai, Osaka 599-8531, Japan*

[ryu@c.s.osakafu-u.ac.jp](mailto:ryu@c.s.osakafu-u.ac.jp)

#### Table of Contents

|                               |       |
|-------------------------------|-------|
| General Information           | S2    |
| Typical Procedure for Table 1 | S3-4  |
| Typical Procedure for Table 2 | S4-5  |
| Spectrum Data                 | S6-8  |
| References                    | S8    |
| Spectrum Chart                | S9-22 |

## General Information

<sup>1</sup>H NMR spectra were recorded using JEOL ECP-500 (500 MHz) or JEOL ECS-400 (400 MHz) spectrometers in CDCl<sub>3</sub> and are referenced at 7.26 ppm for CHCl<sub>3</sub>. <sup>13</sup>C NMR spectra were recorded using JEOL ECP-500 (125 MHz) or JEOL ECS-400 (100 MHz) spectrometers in CDCl<sub>3</sub> and are referenced at 77.16 ppm for CHCl<sub>3</sub>. Chemical shifts are reported in parts per million (δ). Splitting patterns are indicated as follows: br, broad; s, singlet; d, doublet; t, triplet; m, multiplet. Infrared spectra were obtained on a JASCO FT/IR-4100 spectrometer; absorptions were reported in reciprocal centimeters. Both conventional and high-resolution mass spectra were recorded with a JEOL MS-700 spectrometer. The melting point was measured according to the BÜCHI Melting Point B-540. The products were purified by flash column chromatography on silica gel (Kanto Chem. Co. Silica Gel 60N (spherical, neutral, 40-50 μm)) and, if necessary, were further purified by preparative HPLC (Japan Analytical Industry Co., Ltd., LC-908) with GPC columns using CHCl<sub>3</sub> as an eluent.

THF was distilled from sodium and benzophenone prior to use. *N,N,N',N'*-tetramethylethylenediamine (TMEDA) and trimethylchlorosilane (TMSCl) were distilled from CaH<sub>2</sub>. The starting materials **1b**<sup>1</sup> and **1c**<sup>2</sup> were prepared according to the literature procedures. Other reagents were commercially available and used without further purification.

Stainless steel T-shaped micromixers with inner diameter of 400 and 600 μm were purchased from MiChS Co., Ltd.<sup>3</sup> Stainless steel and PTFE microtube reactors with inner diameters of 1000 μm were purchased from GL Sciences Inc. The microreactor and microtube reactors were connected with PEEK fittings (GL Sciences Inc., 1/16"). Back-pressure regulators (40 and 75 psi) were purchased from M & S Instruments Inc. Solutions were introduced to the flow microreactor system using syringe pumps, YSP-101 and YSP-301 (YMC Co., Ltd.), equipped with gastight syringes. These syringes were purchased from SGE Analytical Science Pty. Ltd.

Carbon monoxide was delivered to the micromixer at a constant rate through a mass flow controller, MiChS GFC-1, from a CO gas cylinder. The pressure of the system was controlled by a back-pressure regulator and was monitored by a pressure monitor on the mass flow controller. Residence time at **R2** was estimated according to the equation:  $t \text{ (min)} = \text{inner volume of } \mathbf{R2} \text{ (mL)} / [\text{liquid flow rate (mL min}^{-1}) + \text{CO flow rate at 25 } ^\circ\text{C, 1 atm (mL min}^{-1}) / \text{pressure of CO (atm)}]$ .

### Typical Procedure for Two-Consecutive-Flow Reaction (Table 1, entry 3)

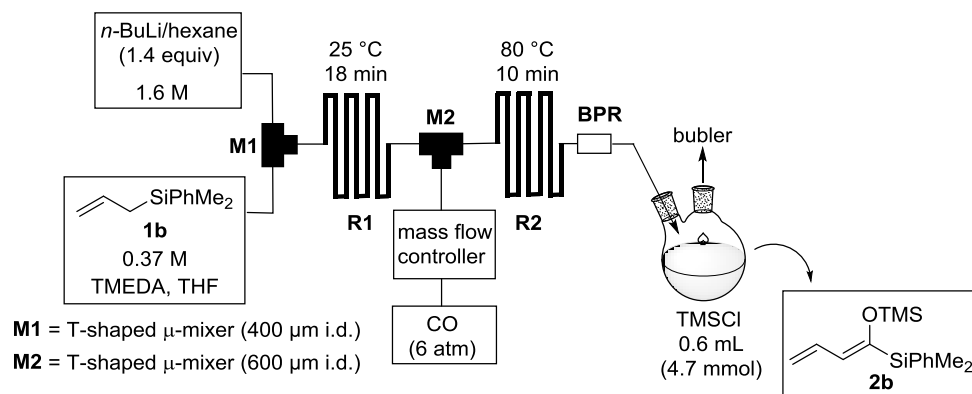

Allyl(phenyl)dimethylsilane (**1b**) (0.704 g, 3.99 mmol) was dissolved in THF (9 mL) and TMEDA (1.8 mL, 12 mmol) and then placed in a syringe, which was then attached to a syringe pump. A THF/TMEDA solution of **1b** (flow rate: 0.2 mL min<sup>-1</sup>) and a hexane solution of *n*-BuLi (flow rate: 0.065 mL min<sup>-1</sup>) were mixed in **M1** (400  $\mu$ m i.d.) at 25 °C using syringe pumps. The resultant reaction mixture was fed into **R1** (channel diameter = 1000  $\mu$ m, length = 6 m) and was then mixed with pressurized carbon monoxide (6 atm, 7.46 mL min<sup>-1</sup> (in terms of 1 atm), 4.5 equiv) in **M2** (600  $\mu$ m i.d.), which was supplied through a mass flow controller. The reaction mixture was passed through **R2** (channel diameter = 1000  $\mu$ m, length = 20 m), which was connected to a back-pressure regulator (75 psi), and was collected from the outlet. The reaction mixture eluted during the first 5 min was discarded and the following portion was collected for a 5 min period in a glass flask that contained TMSCl (0.6 mL, 4.7 mmol). The collected reaction mixture was stirred at 25 °C for 1 h and then aqueous workup with ether and a NaHCO<sub>3</sub> aqueous solution was conducted. The ethereal solution was dried over MgSO<sub>4</sub>. The filtration and evaporation of the solvents gave a crude reaction mixture, which was purified by flash column chromatography on SiO<sub>2</sub> (hexane) to give **2b** (93.3 mg, 91%).

**Table S1. Details of Continuous Microflow Reaction for Table 1 in the Manuscript**

| entry | length (m) |           | CO (atm) | flow rate (mL min <sup>-1</sup> ) |                |                 |
|-------|------------|-----------|----------|-----------------------------------|----------------|-----------------|
|       | <b>R1</b>  | <b>R2</b> |          | <b>1b</b>                         | <i>n</i> -BuLi | CO <sup>a</sup> |
| 1     | 6          | 10        | 4        | 0.15                              | 0.048          | 5.55 (1.39)     |
| 2     | 10.5       | 20        | 4        | 0.2                               | 0.065          | 7.46 (1.87)     |
| 3     | 6          | 20        | 6        | 0.2                               | 0.065          | 7.46 (1.24)     |

Inner diameters of **R1** and **R2** are 1000  $\mu$ m.

<sup>a</sup>Flow rate at standard condition of 25 °C and 1 atm. Calculated flow rate at actual pressure at 25 °C is shown in parentheses.

**(E)-((1-(Dimethylphenylsilyl)-1,3-butadienyl)oxy)trimethylsilane (2b)**

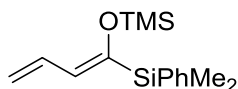

colorless oil;  $R_f = 0.1$  (hexane);  $^1\text{H}$  NMR (400 MHz,  $\text{CDCl}_3$ )  $\delta$  0.05 (s, 9H), 0.41 (s, 6H), 4.98 (dd,  $J = 10.4, 1.2$  Hz, 1H), 5.13 (dd,  $J = 17.6, 2.4$  Hz, 1H), 5.79 (d,  $J = 10.4$  Hz, 1H), 6.66 (ddd,  $J = 17.2, 10.6, 10.4$  Hz, 1H), 7.30-7.40 (m, 3H), 7.50-7.58 (m, 2H);  $^{13}\text{C}$  NMR (125 MHz,  $\text{CDCl}_3$ )  $\delta$  -3.13, 0.97, 115.2, 126.4, 127.9, 129.4, 130.6, 134.4, 137.0, 158.6. These spectral data are consistent with those previously reported in the literature.<sup>4</sup>

**Typical Procedure for Three-Consecutive-Flow Reactions (Table 2, entry 1)**

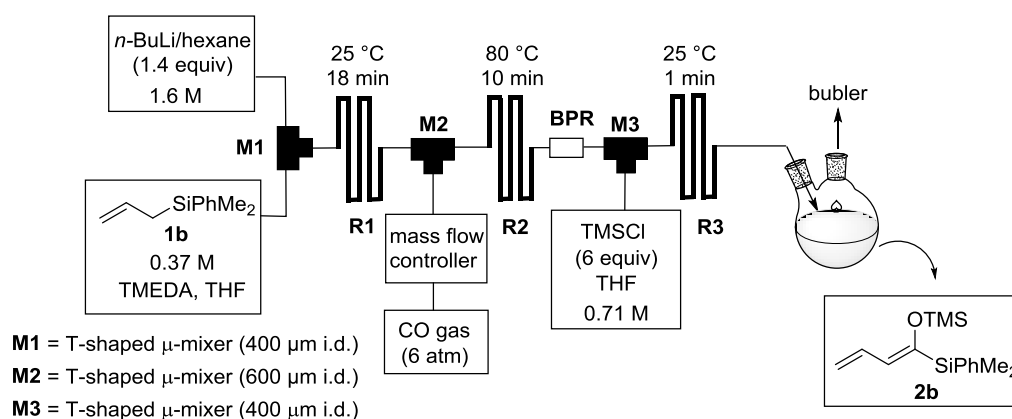

Allyl(phenyl)dimethylsilane (**1b**) (0.697 g, 3.95 mmol) was dissolved in THF (9 mL) and TMEDA (1.8 mL, 12 mmol) and then placed in a syringe, which was then attached to a syringe pump. A THF/TMEDA solution of **1b** (flow rate:  $0.2\text{ mL min}^{-1}$ ) and a hexane solution of *n*-BuLi (flow rate:  $0.065\text{ mL min}^{-1}$ ) were mixed in a **M1** (400  $\mu\text{m}$  i.d.) at 25 °C using syringe pumps. The resultant reaction mixture was fed into **R1** (channel diameter = 1000  $\mu\text{m}$ , length = 6 m) and was then mixed with pressurized carbon monoxide (6 atm,  $7.46\text{ mL min}^{-1}$  (in terms of 1 atm), 4.5 equiv) in **M2** (600  $\mu\text{m}$  i.d.), which was supplied through a mass flow controller. The reaction mixture was passed through **R2** (channel diameter = 1000  $\mu\text{m}$ , length = 20 m), which was connected to a back-pressure regulator (75 psi), and was quenched by mixing with a THF solution of TMSCl (flow rate:  $0.625\text{ mL min}^{-1}$ ) in **M3** (400  $\mu\text{m}$  i.d.), and then fed into **R3** (channel diameter = 1000  $\mu\text{m}$ , length = 11 m). A mixture of the product was collected from the outlet. The reaction mixture eluted during the first 5 min was discarded and the following portion was collected for a 5 min period. After collection, an aqueous

workup with ether and a NaHCO<sub>3</sub> aqueous solution was conducted. The ethereal solution was dried over MgSO<sub>4</sub>. The filtration and evaporation of the solvents, gave a crude reaction mixture, which was purified by flash column chromatography on SiO<sub>2</sub> (hexane) to give **2b** (94.2 mg, 93%).

**Table S2. Details of Continuous Microflow Reaction for Table 2 and Scheme 4 in the Manuscript**

| entry    | 1                                                                                                | length (m) |    |    | electrophiles                                                                       | products                                                                                                                                         |
|----------|--------------------------------------------------------------------------------------------------|------------|----|----|-------------------------------------------------------------------------------------|--------------------------------------------------------------------------------------------------------------------------------------------------|
|          |                                                                                                  | R1         | R2 | R3 |                                                                                     |                                                                                                                                                  |
| 1        | <b>1b</b>                                                                                        | 6          | 20 | 11 | TMSCl                                                                               | 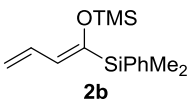<br><b>2b</b>                                                  |
| 2        | <b>1a</b>                                                                                        | 6          | 10 | 11 | TMSCl                                                                               | <br><b>2a</b>                                                  |
| 3        | <br><b>1c</b>   | 6          | 20 | 11 | TMSCl                                                                               | <br><b>2c</b>                                                 |
| 4        | <br><b>1d</b> | 10.5       | 10 | 11 | TMSCl                                                                               | <br><b>2d</b>                                                |
| 5        | <b>1d</b>                                                                                        | 10.5       | 10 | 11 |  | <br><b>4</b> Ar = <i>p</i> -Cl-C <sub>6</sub> H <sub>4</sub> |
| 6        | <b>1d</b>                                                                                        | 10.5       | 10 | 11 | Mel                                                                                 | <br><b>5</b>                                                 |
| Scheme 4 | <b>1e</b>                                                                                        | 10.5       | 10 | 11 | TMSCl                                                                               | <br><b>2e</b>                                                |

Flow rate: A THF/TMEDA solution of **1** (0.2 mL min<sup>-1</sup>), A hexane solution of *n*-BuLi (0.065 mL min<sup>-1</sup>), CO (7.46 sccm, where sccm denotes mL min<sup>-1</sup> at the standard condition of 25 °C and 1 atm.), electrophiles (0.625 mL min<sup>-1</sup>).  
Inner diameters of **R1**, **R2**, and **R3** are 1000 μm.

## Spectrum Data

### (*E*)-Trimethyl((1-(trimethylsilyl)-1,3-butadien-1-yl)oxy)silane (2a)

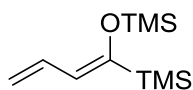

colorless oil;  $R_f = 0.25$  (hexane);  $^1\text{H}$  NMR (400 MHz,  $\text{CDCl}_3$ )  $\delta$  0.13 (s, 9H), 0.21 (s, 9H), 4.96 (dd,  $J = 10.8, 1.6$  Hz, 1H), 5.13 (dd,  $J = 16.8, 1.6$  Hz, 1H), 5.75 (d,  $J = 10.4$  Hz, 1H), 6.66 (ddd,  $J = 16.8, 10.6, 10.4$  Hz, 1H);  $^{13}\text{C}$  NMR (100 MHz,  $\text{CDCl}_3$ )  $\delta$  -1.73, 0.99, 114.8, 125.0, 130.6, 160.4. These spectral data are consistent with those previously reported in the literature.<sup>4</sup>

### ((1*E*,3*E*)-1-((Trimethylsilyl)oxy)-1,3-butadien-1,4-diyl)bis(trimethylsilane) (2c)

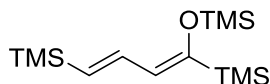

colorless oil;  $R_f = 0.25$  (hexane);  $^1\text{H}$  NMR (400 MHz,  $\text{CDCl}_3$ )  $\delta$  0.07 (s, 9H), 0.12 (s, 9H), 0.21 (s, 9H), 5.76 (d,  $J = 10.0$  Hz, 1H), 5.77 (d,  $J = 18.4$  Hz, 1H), 6.88 (dd,  $J = 18.4, 10.0$  Hz, 1H);  $^{13}\text{C}$  NMR (125 MHz,  $\text{CDCl}_3$ )  $\delta$  -1.75, -0.99, 1.16, 127.1, 131.2, 137.6, 160.5; IR (neat): 1604, 1554  $\text{cm}^{-1}$ ; EIMS  $m/z$  (relative intensity) 286 ( $\text{M}^+$ , 29), 183 (14), 148 (11), 147 (74), 73 (100). HRMS (EI)  $m/z$  calcd for  $\text{C}_{13}\text{H}_{30}\text{OSi}_3$  ( $\text{M}^+$ ): 286.1604, found: 286.1605.

### (*E*)-Trimethyl((2-phenyl-1-(trimethylsilyl)ethenyl)oxy)silane (2d)

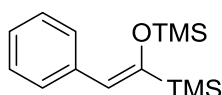

colorless oil;  $R_f = 0.125$  (hexane);  $^1\text{H}$  NMR (400 MHz,  $\text{CDCl}_3$ )  $\delta$  0.06 (s, 9H), 0.20 (s, 9H), 5.93 (s, 1H), 7.16 (t,  $J = \text{Hz}$ , 1H), 7.28 (t,  $J = 7.2\text{Hz}$ , 2H), 7.50 (d,  $J = 6.8$  Hz, 2H);  $^{13}\text{C}$  NMR (125 MHz,  $\text{CDCl}_3$ )  $\delta$  -1.28, 1.16, 123.4, 126.4, 128.1, 129.1, 136.5, 159.9. These spectral data are consistent with those previously reported in the literature.<sup>5</sup>

**(1*S*,2*S*,3*R*)-rel-1-(4-Chlorobenzoate)-3-(4-Chlorophenyl)-2-phenyl-1-(trimethylsilyl)-1,3-propanediol (4)**

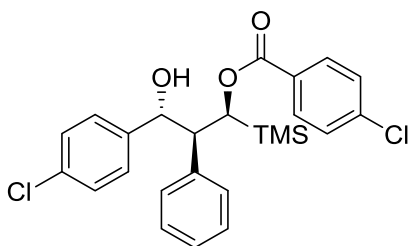

White solid; m.p. 105-108 °C;  $R_f$  = 0.1 (hexane : EtOAc = 50 : 1);  $^1\text{H}$  NMR (400 MHz,  $\text{CDCl}_3$ )  $\delta$  -0.17 (s, 9H), 2.95 (dd,  $J$  = 10.0, 2.4 Hz, 1H), 4.56 (dd,  $J$  = 10.0, 3.2 Hz, 1H), 4.72 (d,  $J$  = 3.2 Hz, 1H), 5.74 (d,  $J$  = 2.4 Hz, 1H), 6.92-6.94 (m, 4H), 7.04 (d,  $J$  = 8.8 Hz, 2H), 7.13-7.14 (m, 3H), 7.54 (dd,  $J$  = 6.8, 2.4 Hz, 2H), 8.11 (dd,  $J$  = 6.8, 2.4 Hz, 2H);  $^{13}\text{C}$  NMR (100 MHz,  $\text{CDCl}_3$ )  $\delta$  -3.11, 57.05, 69.81, 73.65, 127.2, 128.0, 128.1, 128.2, 128.4, 129.4, 129.9, 131.4, 132.7, 138.6, 140.4, 140.5, 168.3; IR (neat): 3477, 1695  $\text{cm}^{-1}$ ; EIMS  $m/z$  (relative intensity) 457 ( $\text{M}^+ - \text{CH}_3$ , 1), 177 (21), 176 (96), 162 (14), 161 (83), 145 (15), 139 (100), 113 (11), 111 (21), 77 (24), 73 (35). HRMS (EI)  $m/z$  calcd for  $\text{C}_{24}\text{H}_{23}\text{Cl}_2\text{O}_3\text{Si}$  ( $\text{M}^+ - \text{CH}_3$ ): 457.0794, found: 457.0804.

The stereoconfiguration of this compound was determined by referring to the  $^1\text{H}$  NMR spectrum of the related compound in literature.<sup>6</sup>

**2-Phenyl-1-(trimethylsilyl)-1-propanone (5)**

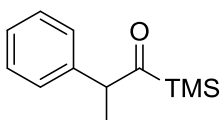

yellow oil;  $R_f$  = 0.125 (hexane : EtOAc = 50 : 1);  $^1\text{H}$  NMR (400 MHz,  $\text{CDCl}_3$ )  $\delta$  -0.02 (s, 9H), 1.28 (d,  $J$  = 7.2 Hz, 3H), 4.01 (q,  $J$  = 7.2 Hz, 1H), 7.12-7.13 (m, 2H), 7.24-7.26 (m, 1H), 7.30-7.34 (m, 2H);  $^{13}\text{C}$  NMR (100 MHz,  $\text{CDCl}_3$ )  $\delta$  -2.51, 16.3, 57.5, 127.0, 128.7, 139.1, 244.5. These spectral data are consistent with those previously reported in the literature.<sup>7</sup>

**Trimethyl(((1*E*)-1-(trimethylsilyl)-1-hepten-1-yl)oxy)silane (2e)**

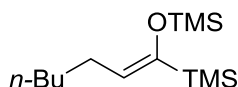

colorless oil;  $^1\text{H}$  NMR (500 MHz,  $\text{CDCl}_3$ )  $\delta$  0.09 (s, 9H), 0.18 (s, 9H), 0.89 (t,  $J = 6.4$  Hz, 3H), 1.30-1.33 (m, 6H), 2.05-2.06 (m, 2H), 5.01 (t,  $J = 6.8$  Hz, 1H);  $^{13}\text{C}$  NMR (100 MHz,  $\text{CDCl}_3$ )  $\delta$  -1.51, 1.07, 14.2, 22.7, 25.9, 29.4, 32.0, 125.9, 156.5; IR (neat): 1616  $\text{cm}^{-1}$ ; EIMS  $m/z$  (relative intensity) 258 ( $\text{M}^+$ , 11), 201 (16), 185 (61), 184 (11), 148 (11), 147 (71), 133 (13), 73(100). HRMS (EI)  $m/z$  calcd for  $\text{C}_{13}\text{H}_{30}\text{OSi}_2$  ( $\text{M}^+$ ): 258.1835, found: 258.1826.

**References**

- (1) Soderquist, J. A.; Hassner, A. *J. Org. Chem.* **1983**, *48*, 1801.
- (2) Ihara, E.; Koyama, K.; Yasuda, H.; Kanehisa, N.; Kai, Y. *J. Organomet. Chem.* **1999**, *574*, 40.
- (3) [http://www.michs.jp/index\\_en.html](http://www.michs.jp/index_en.html)
- (4) Ryu, I.; Yamamoto, H.; Sonoda, N.; Murai, S. *Organometallics* **1996**, *15*, 5459.
- (5) Murai, S.; Ryu, I.; Iriguchi, J.; Sonoda, N. *J. Am. Chem. Soc.* **1984**, *106*, 2440.
- (6) Honda, M.; Iwamoto, R.; Nogami, Y.; Segi, M. *Chem. Lett.* **2005**, *34*, 466.
- (7) Nakada, M.; Urano, Y.; Kobayashi, S.; Ohno, M. *J. Am. Chem. Soc.* **1988**, *110*, 4826.



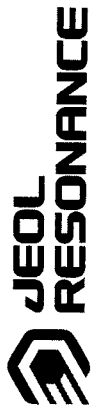

Filename = C:\Users\delia\Documents\J  
 Author = delia  
 Experiment = proton\_jyp  
 Sample Id = tt-b4-124-ft.3-7  
 Solvent = CHLOROFORM-D  
 Creation Time = 24-JAN-2013 20:20:11  
 Revision Time = 12-MAR-2013 16:46:18  
 Current Time = 12-MAR-2013 16:52:14  
 Comment = single pulse  
 Data Format = ID COMEX  
 Data Size = 13107  
 Data Title = Proton  
 Data Units = [ppm]  
 Dimensions =  
 Status = NMR-EGS400  
 Spectrometer = DELTA2\_NMR  
 Field Strength = 9.4249681[T] (400[MHz])  
 X\_Acq\_Duration = 2.1757952[s]  
 X\_Domain = 1H  
 X\_Freq = 401.28219856[MHz]  
 X\_Offset = 16384  
 X\_Points = 1  
 X\_Prescans = 1  
 X\_Resolution = 0.45960208[Hz]  
 X\_Sweep = 7.53012048[kHz]  
 X\_Sweep\_Clip = 6.02409639[kHz]  
 Irr\_Domain = Proton  
 Irr\_Freq = 401.28219856[MHz]  
 Irr\_Offset = 16384  
 Irr\_Points = 1  
 Tri\_Domain = Proton  
 Tri\_Freq = 401.28219856[MHz]  
 Tri\_Offset = 5[ppm]  
 Tri\_Clipped = FALSE  
 Scans = 8  
 Total\_Scans = 8  
 Relaxation\_Delay = 5[s]  
 Recv\_Gain = 44  
 Temp\_Get = 20.1[degC]  
 X\_90\_Width = 9.25[us]  
 X\_Acq\_Time = 2.1757952[s]  
 X\_Angle = 45[deg]  
 X\_Pulse = 4.8[us]  
 X\_Pulse2 = 4.825[us]  
 Irr\_Mode = Off  
 Tri\_Mode = Off  
 Dante\_Preset = FALSE  
 Initial\_Wait = 1[s]  
 Repetition\_Time = 7.1757952[s]

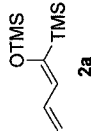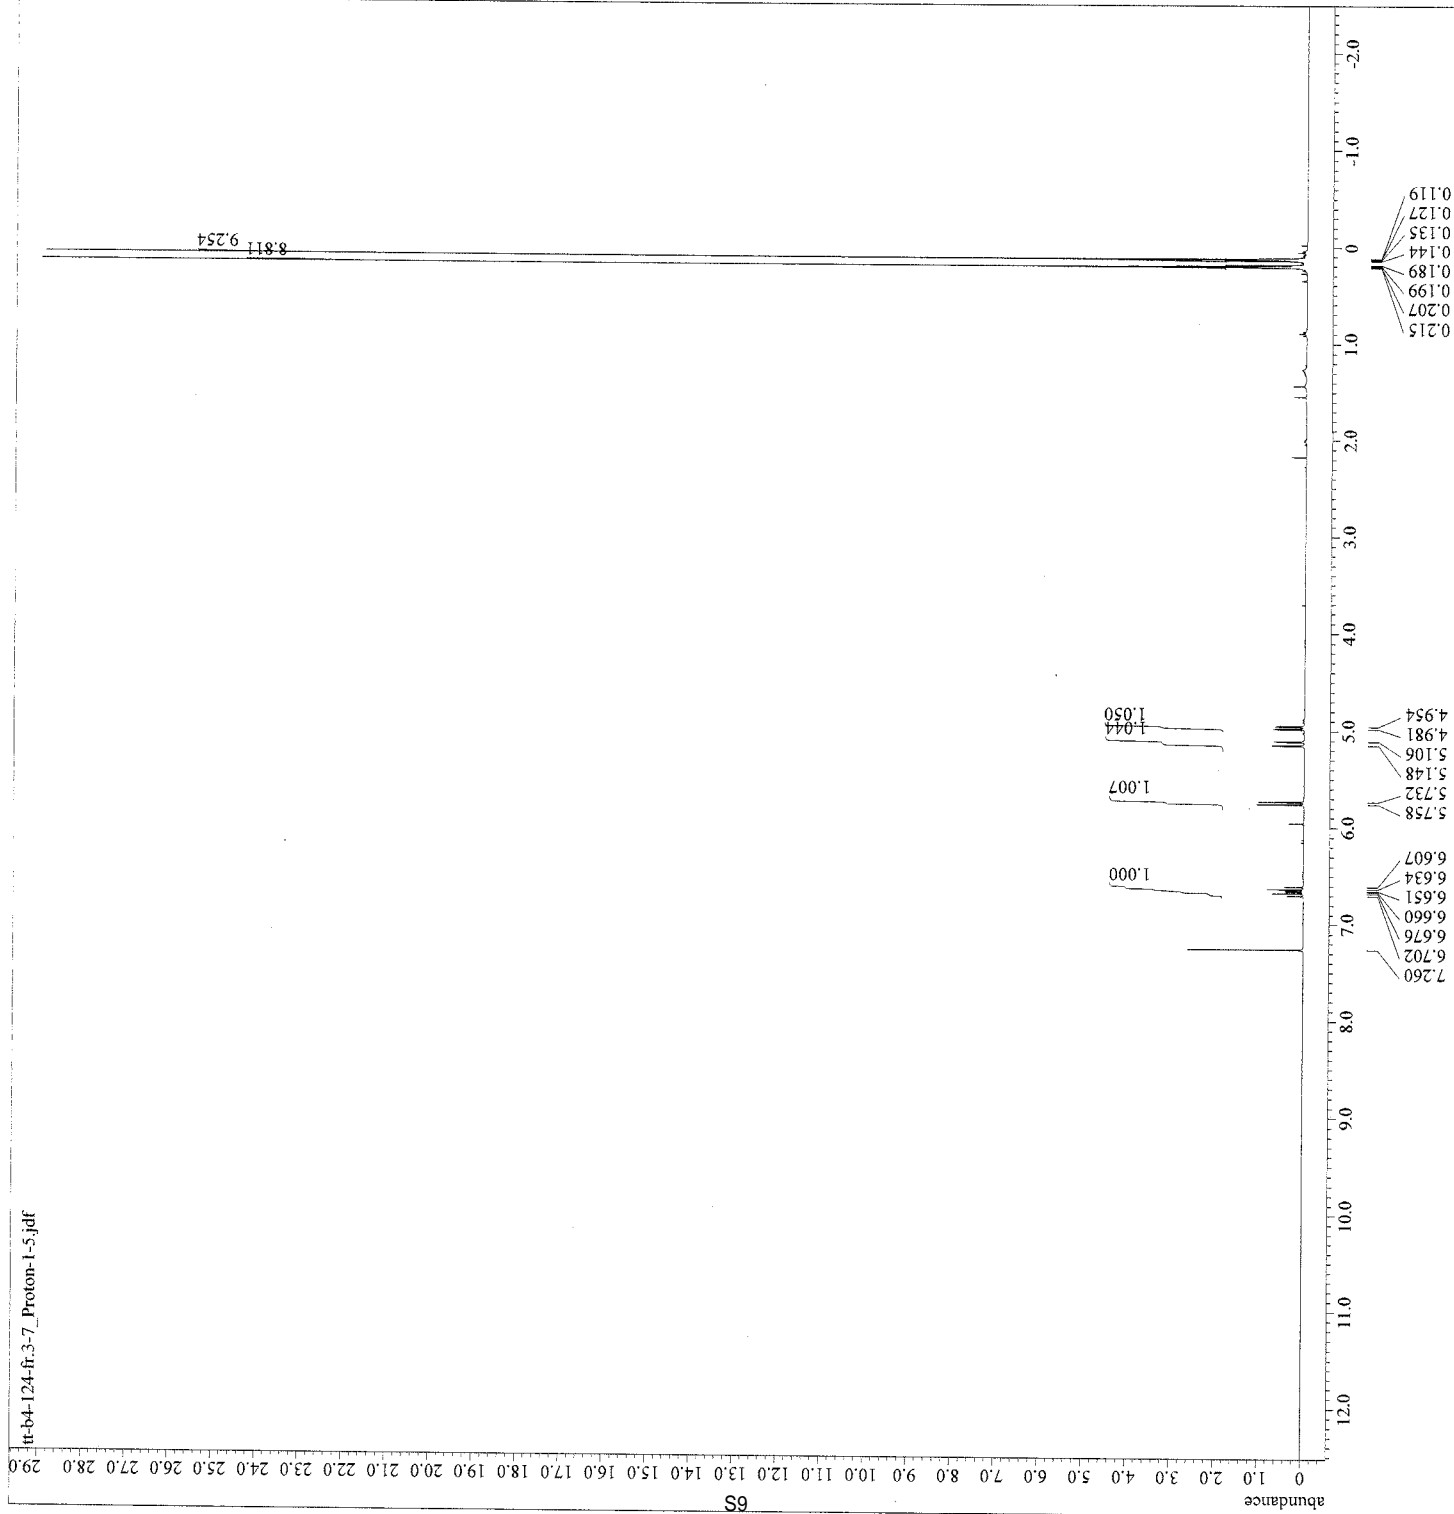

Filename = C:\Users\delia\Documents\J  
 Author = delta  
 Experiment = carbon\_jsp  
 Sample Id = tt-b4-124-fr.3-71  
 Solvent = CHLOROFORM-D  
 Creation Time = 24-JAN-2013 20:54:49  
 Revision Time = 12-MAR-2013 16:51:26  
 Current Time = 12-MAR-2013 16:51:59  
 Comment = single pulse decoupled gat  
 Data Format = ID COMPLEX  
 Data Size = 26214  
 Data Title = Carbon13  
 Data Units = ppm  
 Dimensions = 2  
 Size = 256-KS400  
 Spectrometer = DELTA2\_NMR  
 Field Strength = 9.42499681[T] (400[MHz])  
 X\_Acq\_Duration = 1.03809024[s]  
 X\_Domain = 13C  
 X\_Freq = 100.90247863[MHz]  
 X\_Offset = 32766  
 X\_Points = 4  
 X\_Prescans = 4  
 X\_Resolution = 0.96330739[Hz]  
 X\_Sweep = 31.56565657[kHz]  
 X\_Sweep\_Clip = 25.25252525[kHz]  
 Irr\_Domain = proton  
 Irr\_Freq = 401.28219856[MHz]  
 Irr\_Offset = 51200  
 Clipped = FALSE  
 Scans = 256  
 Total Scans = 256  
 Relaxation Delay = 2[s]  
 Recycle Gain = 20  
 T1\_Rho = 2.41[sec]  
 T1\_Rho\_2 = 8.75[us]  
 X\_90\_Width = 1.03809024[s]  
 X\_Acq\_Time = 30[deg]  
 X\_Angle = 5.2[deg]  
 X\_Pulse = 2.91666667[us]  
 Irr\_Atn\_Dec = 22.6911[deg]  
 Irr\_Atn\_Dec\_2 = 22.6911[deg]  
 Irr\_Noise = 0.115[ms]  
 Irr\_Width = 0.115[ms]  
 Decoupling = TRUE  
 Initial Wait = 1[s]  
 Noe = TRUE  
 Noe\_Time = 2[s]  
 Acquisition Time = 3.03809024[s]

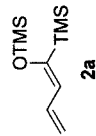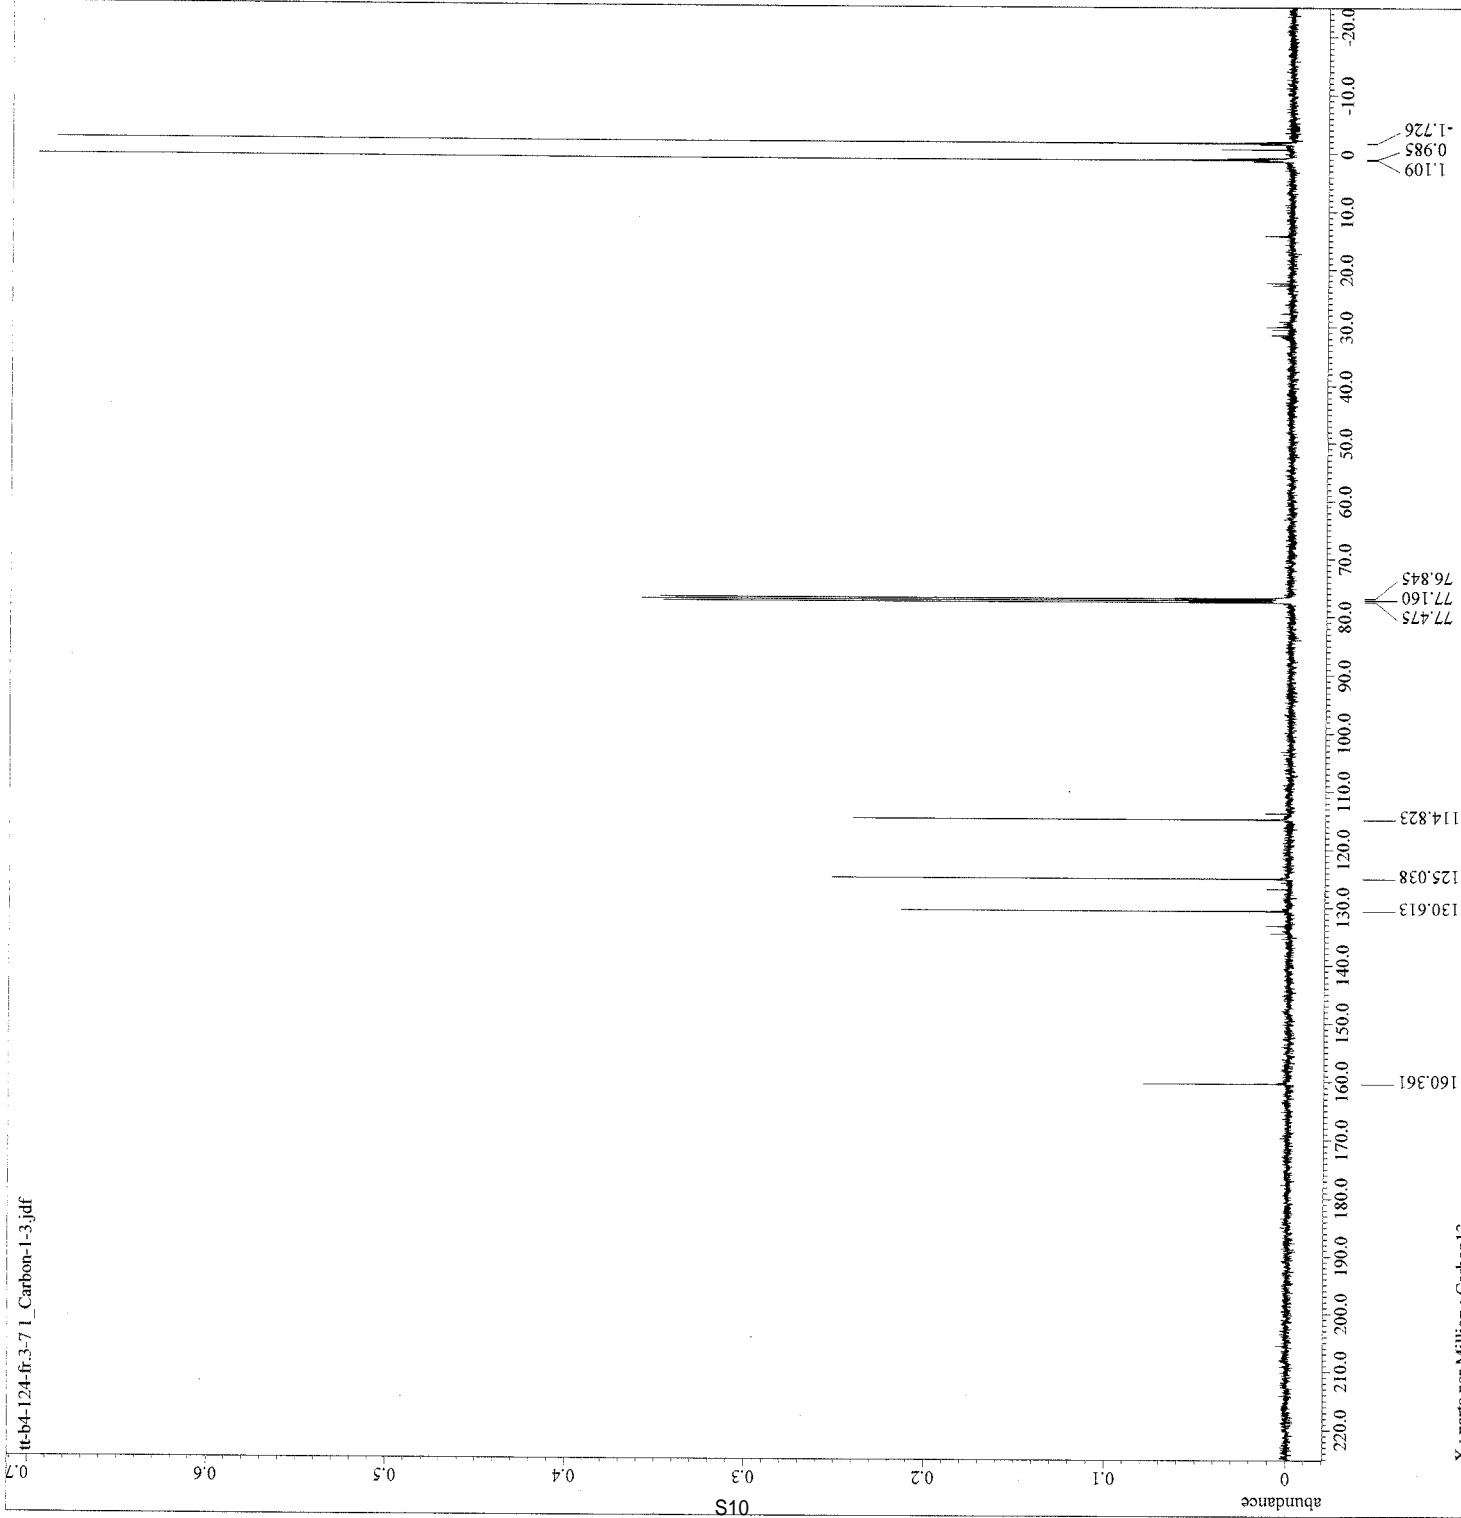

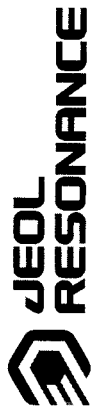

|                  |                                          |
|------------------|------------------------------------------|
| FileNames        | = C:\Users\deltaelta\Documents\deltaelta |
| Author           | = proton_jxp                             |
| Experiment       | = tt-b4-106-fr.3-9                       |
| Sample_Id        | = CHLOROFORM-D                           |
| Solvent          | = CHLOROFORM-D                           |
| Creation_Time    | = 10-DEC-2012 21:30:03                   |
| Acquisition_Time | = 12-MAR-2013 16:52:26                   |
| Current_Time     | = 12-MAR-2013 16:52:26                   |
| Comment          | = single pulse                           |
| Data_Format      | = 1D COMEXX                              |
| Dim_Size         | = 13107                                  |
| Dim_Title        | = Proton                                 |
| Dimensions       | = X (ppm)                                |
| SI_Site          | = X                                      |
| Spectrometer     | = JNM-ECX400                             |
| Field Strength   | = DELTA2_NMR                             |
| Acq_Duration     | = 9.42495681 [T] (400 [MHz])             |
| Chemical_Shift   | = 1.757952 [s]                           |
| Freq             | = 401.28219856 [MHz]                     |
| X_Offset         | = 5 [ppm]                                |
| X_Points         | = 10384                                  |
| X_Prescans       | = 1                                      |
| X_Resolution     | = 0.45602008 [Hz]                        |
| Acq_Sweep        | = 6.02404008 [Hz]                        |
| Clipped          | = 0.02404008 [Hz]                        |
| Irq_Freq         | = Proton                                 |
| Irq_Domain       | = 401.28219856 [MHz]                     |
| Irq_Offset       | = 5 [ppm]                                |
| Trf_Domain       | = Proton                                 |
| Trf_Freq         | = 401.28219856 [MHz]                     |
| Trf_Offset       | = 5 [ppm]                                |
| Clipped          | = PULSE                                  |
| Scans            | = 8                                      |
| Total_Scans      | = 8                                      |
| Relaxation_Delay | = 5 [s]                                  |
| Recov_Gain       | = 46                                     |
| X_90_Time        | = 5 [sG]                                 |
| X_Acq_Time       | = 9.25 [us]                              |
| X_Angle          | = 2.11757952 [s]                         |
| X_Pulse          | = 45 [deg]                               |
| X_Atn            | = 0.8 [dB]                               |
| X_Pulse          | = 4.625 [us]                             |
| Irq_Mode         | = OFF                                    |
| Dance_Preset     | = PULSE                                  |
| Initial Wait     | = 1 [s]                                  |
| Repetition Time  | = 7.1757952 [s]                          |

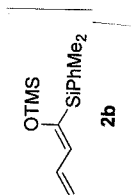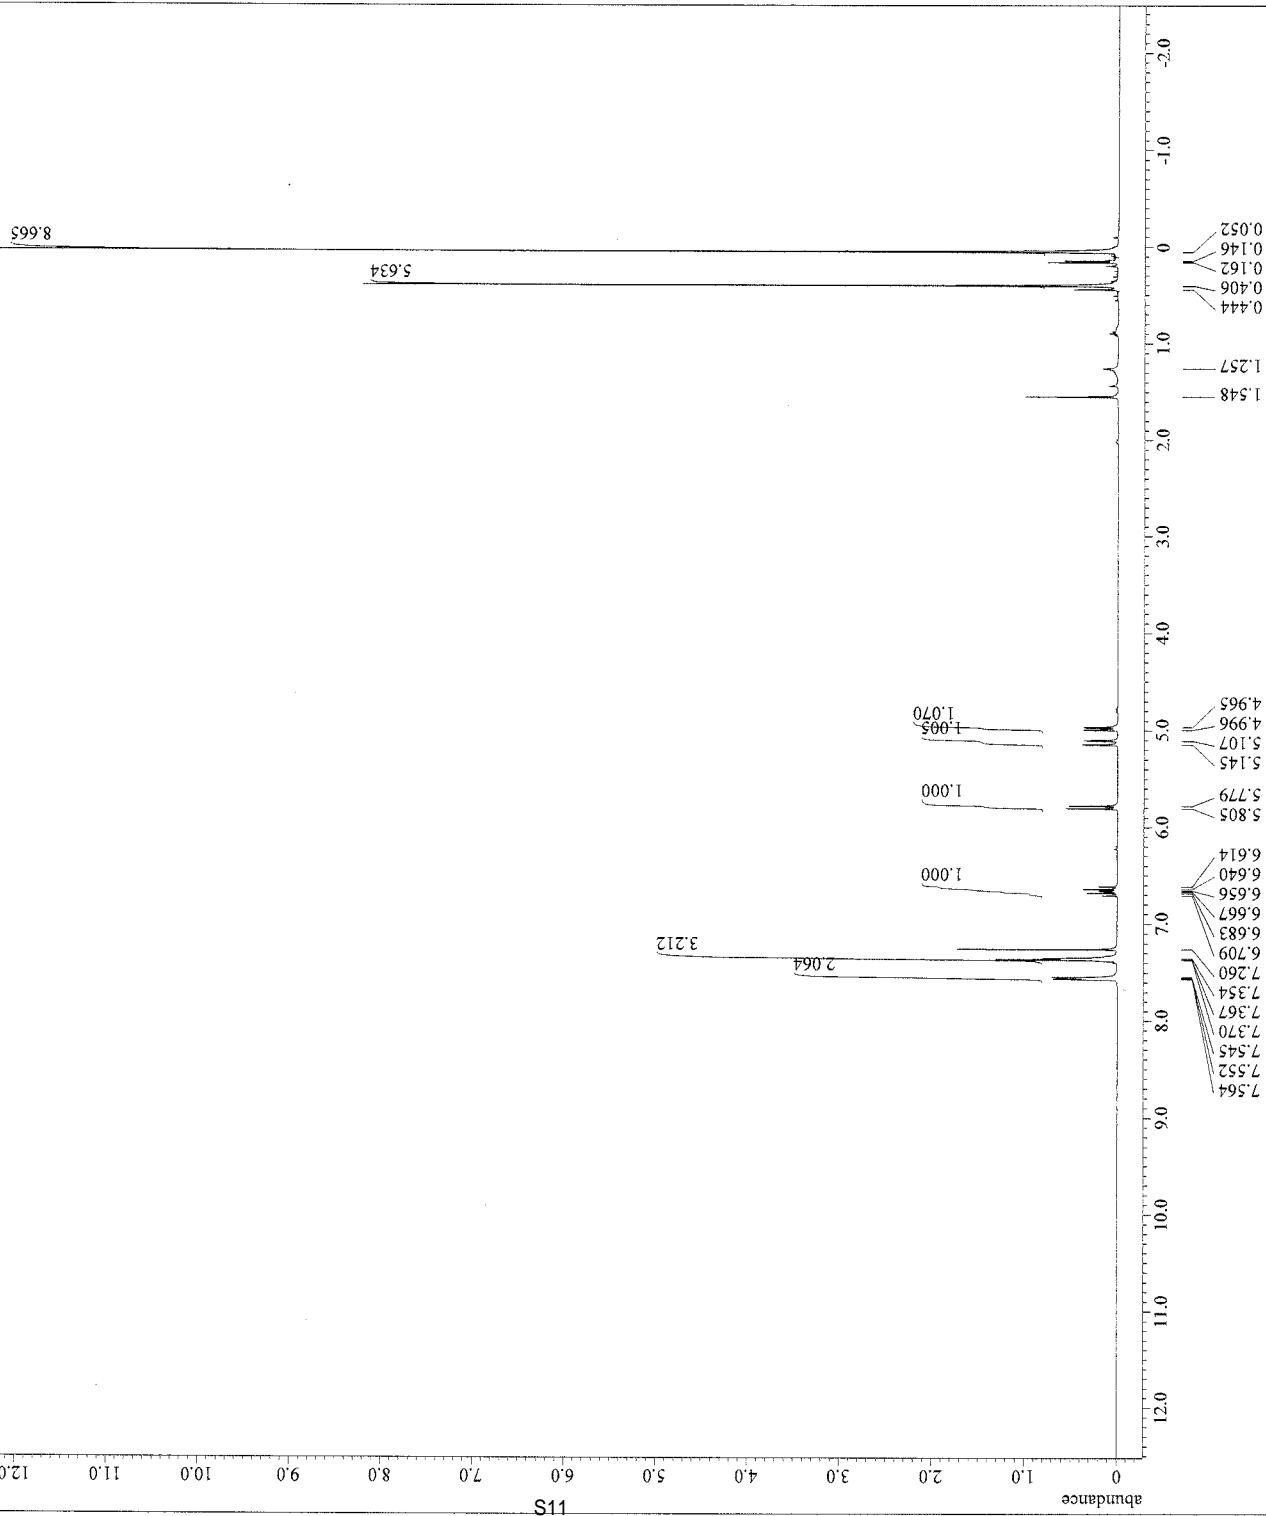

X : parts per Million : Proton

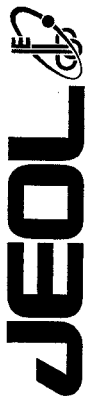

--- PROCESSING PARAMETERS ---  
acquire = 1  
fft = 1  
ppm  
machinephase

7.7-134-20-1

--- ACQUISITION PARAMETERS ---  
File Name = 1d\_13c\_spectrum\_copy.30  
Author =  
Sample ID = tt-b4-20-1  
Content = Single Pulse with Broad  
Creation Date = 20-JUN-2012 18:51:54  
Revision Date = 23-JUN-2012 18:56:05  
Spec Site = ECP500  
Spec Type = DELTA\_NMR  
Data Format = ID COMPLEX  
Pulse Program = zgpg30  
Dim Title = 13C  
Dim Size = 32768  
Dim Units = [ppm]  
Scans = 201.0  
Acq Return = 13C  
X Domain = 13C  
X Offset = 100 [ppm]  
X Freq = 125.77787547 [MHz]  
X Sweep = 31.44654088 [kHz]  
Solvent = CHLOROFORM-D  
Temp Set = 127 [K]  
Temp Get = 23.5 [C]  
Recvr Gain = 30  
Field Strength = 11.7473579 [T]  
Filter Mode = BUTTERWORTH  
Filter Width = 15.7206221 [kHz]

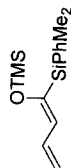

(Millions)

10.0 30.0 50.0 70.0 90.0 110.0 130.0 150.0 170.0 190.0 210.0 230.0 250.0 270.0 290.0 310.0 330.0 350.0

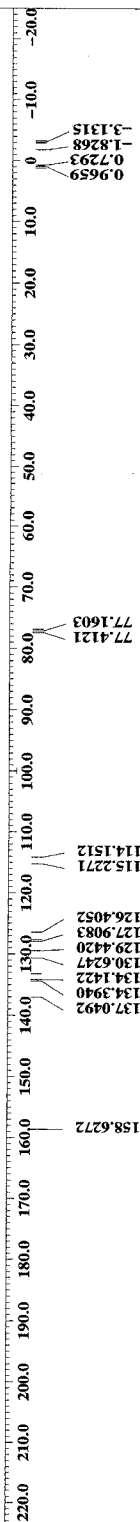

X : parts per Million : 13C

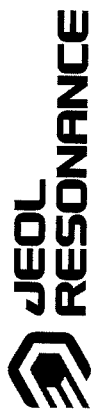

Filename = C:\Users\delta\Documents\J  
 Author = delta  
 Experiment = 108-fr.3-6  
 Sample Id = tt-b4-108-fr.3-6  
 Solvent = CHLOROFORM-D  
 Creation Time = 11-DEC-2012 19:25:45  
 Revision Time = 12-MAR-2013 16:43:34  
 Current Time = 12-MAR-2013 16:52:20  
 Comment = sample pulse  
 Data Format = ID COMPLEX  
 Data Size = 13107  
 Data Title = Proton  
 Data Units = [ppm]  
 Dimensions = X  
 Site = JNM-ECS400  
 Spectrometer = DELTA2\_NMR  
 Field Strength = 9.42495681 [T] (400 [MHz])  
 X Acq Duration = 2.1757952 [s]  
 X Domain = 1H  
 X Freq = 401.28219856 [MHz]  
 X Offset = 5 [ppm]  
 X Points = 16384  
 X Resolution = 0.45960208 [Hz]  
 X Sweep = 7.53012048 [kHz]  
 X Sweep Clipped = 6.02409639 [kHz]  
 Irr Domain = Proton  
 Irr Freq = 401.28219856 [MHz]  
 Irr Offset = 5 [ppm]  
 Irr Points = 16384  
 Irr Domain = Proton  
 Tri Freq = 401.28219856 [MHz]  
 Tri Offset = 5 [ppm]  
 Clipped = FALSE  
 Scans = 8  
 Total Scans = 8  
 Relaxation Delay = 5 [s]  
 Recor Gain = 41  
 Temp Set = 20.8 [dC]  
 X 90 Width = 9.25 [us]  
 X Acq Time = 2.1757952 [s]  
 X Angle = 45 [deg]  
 X Attn = 0.8 [dB]  
 X Pulse = 4.625 [us]  
 X Mode = Off  
 Tri Mode = Off  
 Dantec Presat = FALSE  
 Initial Wait = 1 [s]  
 Repetition Time = 7.1757952 [s]

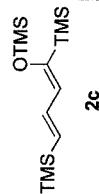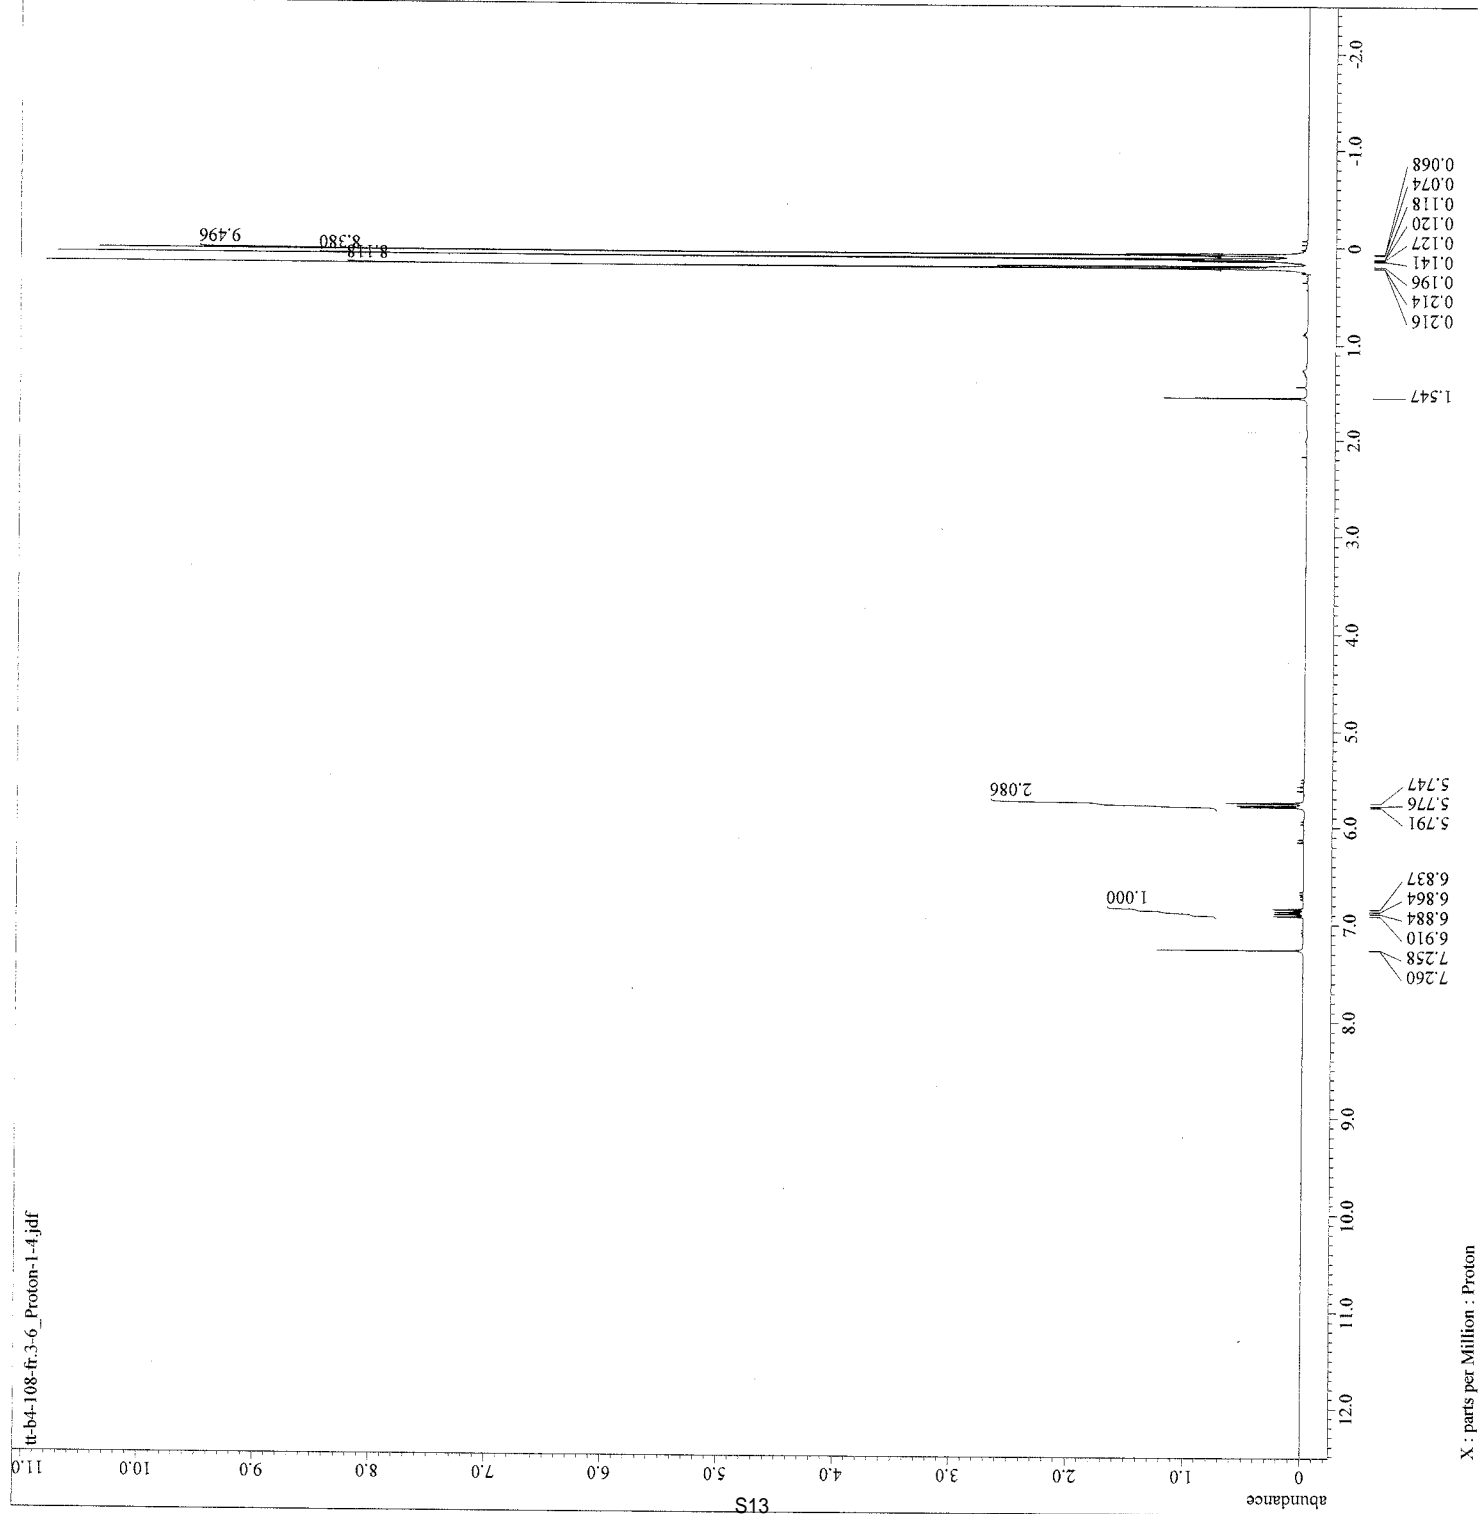

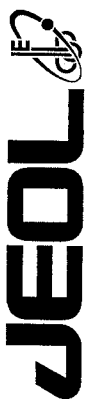

## ----- PROCESSING PARAMETERS -----

```

      dc_balance
      ssexp : 5[Hz]
      fft : 1
      ppm
      machinephase

```

### ----- ACQUISITION PARAMETERS

```

# =====
# File Name      = 14_13c_spectrum.106
# Author         =
# Sample ID     = VV-84-74-FR-3-4
# Contactor     = Steve Pulse with Broad
# Revision Date = 7-MAR-2012 13:28:35
# Revision Date = 10-NOV-2012 15:05:29
# Spec Site     = ECF500
# Spec Type     = DELTA_NMR
# Spec Type     = 1D COMPLEX
# Dimensions    = X
# Dimensions    = Y
# Spin Units    = 32768
# Spin Units    = [cps]
# Scans         = 304
# Scans         = 13C
# C1Acq         = 125.77878547[MHz]
# C1Freq        = 125.77878547[MHz]
# C1Sweep       = 31.44634089[MHz]
# C1Prgm        = 16[Hs]
# C1Prgm        = 24.2[dC]
# Temp_spt     = 30
# Temp_spt     = 7473579.7p
# AcqGain       = 1.0
# AcqGain       = 1.0
# Filter width  = 45.72066221[MHz]
#

```

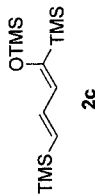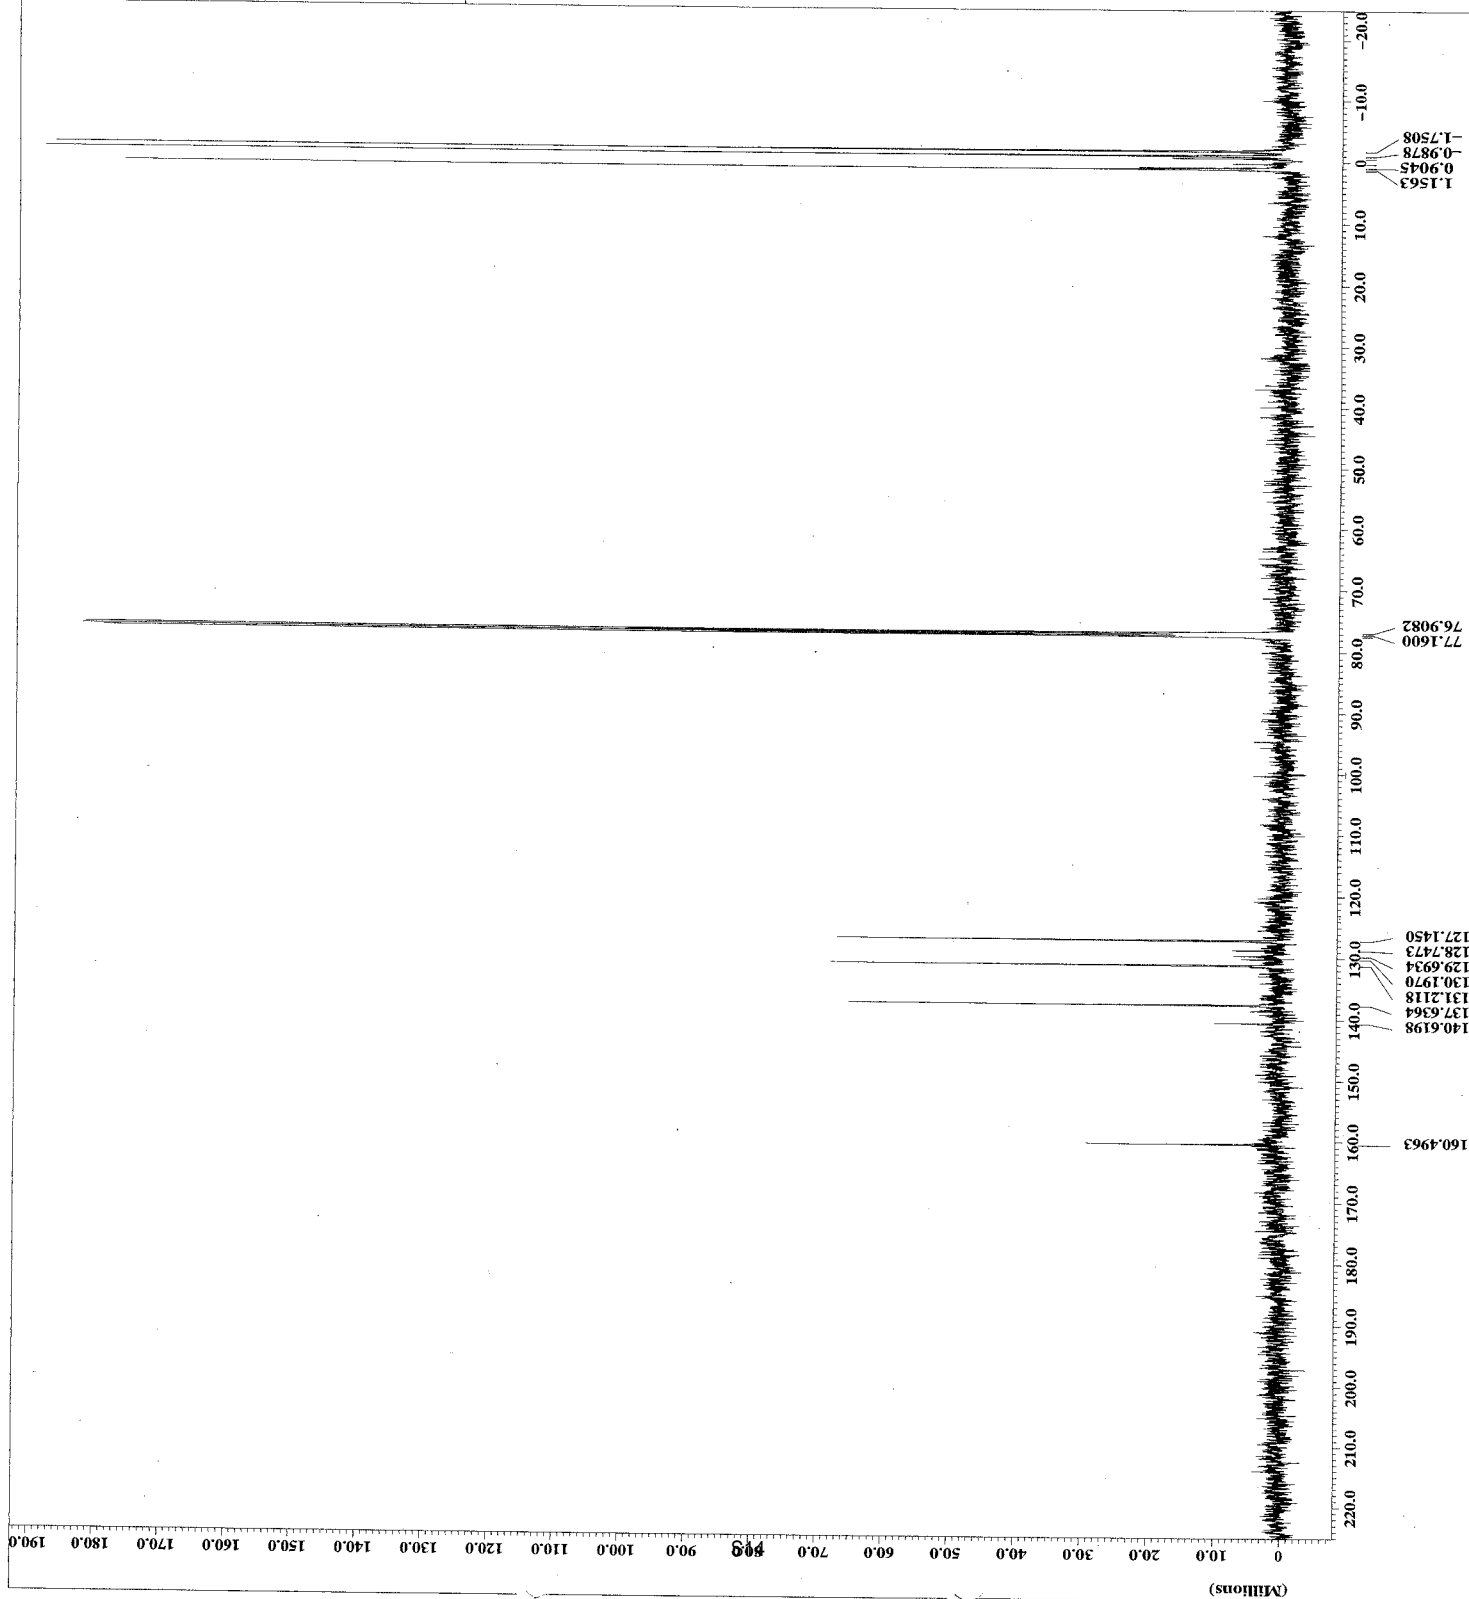

**X : parts per Million : 13C**

|                  |                                   |
|------------------|-----------------------------------|
| FileNames        | = C:\Users\deltaelta\Documents\ex |
| Author           | = delta                           |
| Experiment       | = proton_jxp                      |
| Sample_Id        | = tr-b4-120-fr_2-4                |
| Solvent          | = CHOROFORM-D                     |
| Acquisition_Time | = 12-MAR-2013 19:11:48            |
| Resting_Time     | = 12-MAR-2013 19:33:46            |
| Current_Time     | = 12-MAR-2013 18:33:25            |
| Comment          | = single pulse                    |
| Data_Format      | = ID_COMPLEX                      |
| Dat_Size         | = 13107                           |
| Pulse_Program    | = Proton                          |
| Rm_Tools         | = X                               |
| Dimensions       | = X                               |
| Site             | = JMR-ECS400                      |
| Spectrometer     | = DELTA2_NMR                      |
| Field_Strength   | = 9.42495681 [T] (400 [MHz])      |
| Acq_Duration     | = 1.1757952 [s]                   |
| Q_Offset         | = 18                              |
| Freq             | = 401.28219856 [MHz]              |
| X_Offset         | = 5 [ppm]                         |
| X_Points         | = 16384                           |
| X_Prescans       | = 1                               |
| X_Resolution     | = 0.45460208 [Hz]                 |
| X_Sweep          | = 0.00000000 [Hz]                 |
| X_Sweep_Clippped | = 6.024045639 [kHz]               |
| Irr_Domain       | = Proton                          |
| Irr_Freq         | = 401.28219856 [MHz]              |
| Irr_Offset       | = 5 [ppm]                         |
| Tri_Domain       | = Proton                          |
| Tri_Freq         | = 401.28219856 [MHz]              |
| Tri_Offset       | = 5 [ppm]                         |
| Clipped          | = FALSE                           |
| Scans            | = 8                               |
| Total_Scans      | = 8                               |
| Relaxation_Delay | = 5 [s]                           |
| Recvr_Gain       | = 48                              |
| Recv_Units       | = 7.25 [dB]                       |
| X_90_Width       | = 9.25 [us]                       |
| X_AcqTime        | = 2.1757952 [s]                   |
| X_Angle          | = 45 [deg]                        |
| X_Pulse          | = 0.8 [db]                        |
| X_Align          | = 4.625 [us]                      |
| Irr_Mode         | = Off                             |
| Probe Preset     | = WALTSE                          |
| Initial Wait     | = 1 [s]                           |
| Repetition Time  | = 7.1757952 [s]                   |

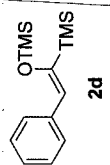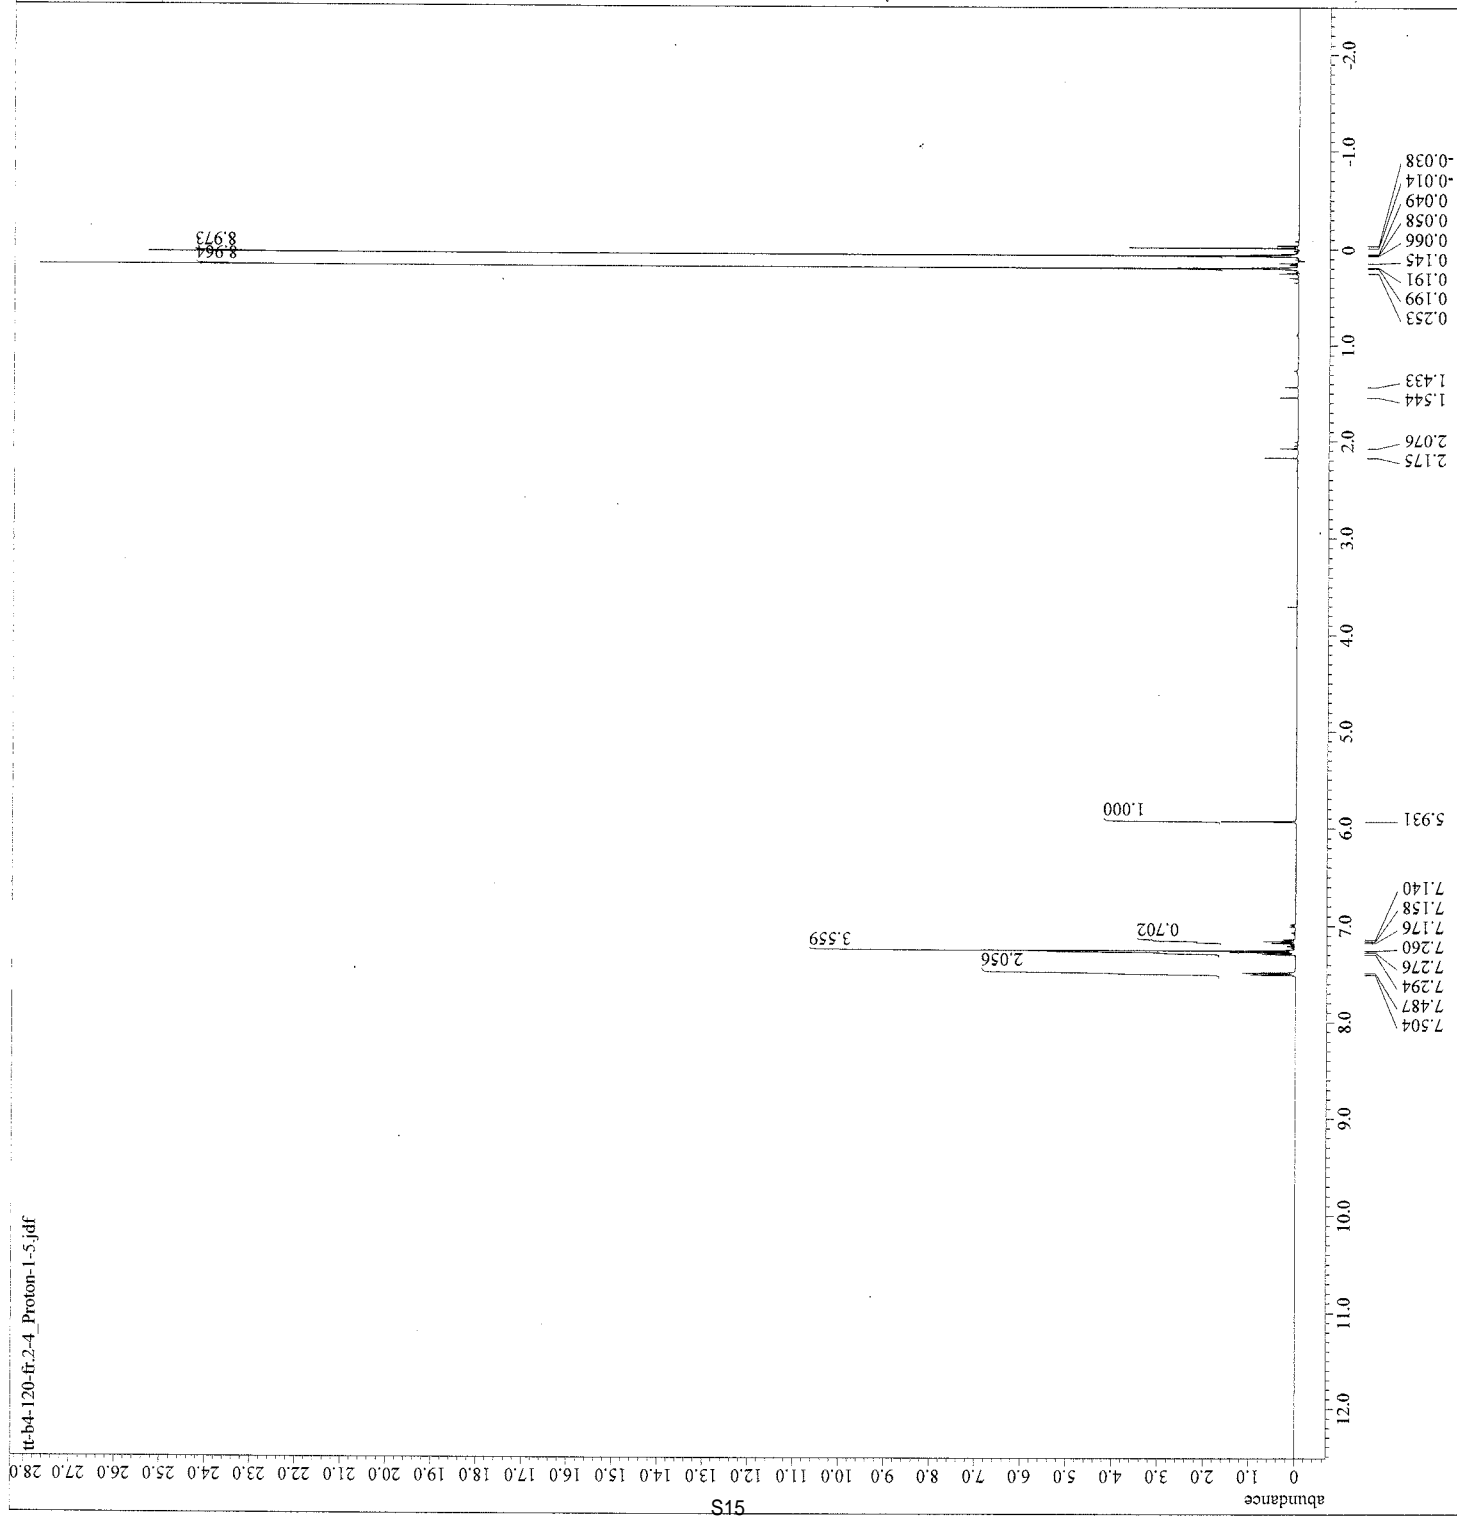

X: parts per Million : Proton

```

----- PROCESSING PARAMETERS -----
dc_balance
sexp : 5[Hz]
fft : 1
ppm
machinephase

```

```

===== ACQUISITION PARAMETERS =====
File Name      = 1d_13c_spectrum.11
Author         =
Sample ID      = tr-54-120-efr-2-4
Experiment     = Single Pulse with Broad
                16-VAN-2013 13:49:52
Creation Date  =
Revision Date  =
Spec Site     = 21-VAN-2013 22:46:08
ECP50         = ECP500
Spec Type     = DEPTA-WO
Data Format    = 1D COMPLEX
Dimensions    = 13c
Dim1 title    = 13c
Dim2 title    = 32F88
Dim3 title    = 32F88
Dim4 title    = 400m
Dim5 title    = 400m
Dim6 title    = 400m
Mod-return    = 1
X.domain      = 13c
X.offset      = 100 [ppm]
X.sweep       = 25.473473 [MHz]
Y.sweep       = 34.4455088 [kHz]
Solvent       = CHOROFORM-D
Spin_get      = 17 [Hz]
Temp_get      = 30.0 [C]
Pulse_prog    = zgpg30
Pulse_gain    = 30
Pulse_length  = 30.7473579 [m]
BUTYRNOGTH    = 15.72066221 [kHz]
Filter_mode   =
Filter_width  =

```

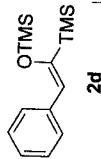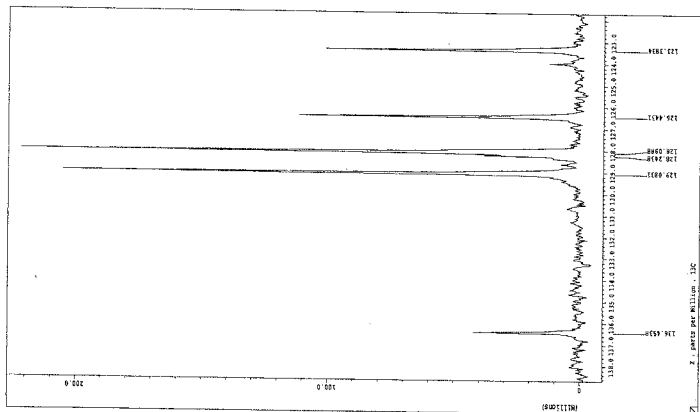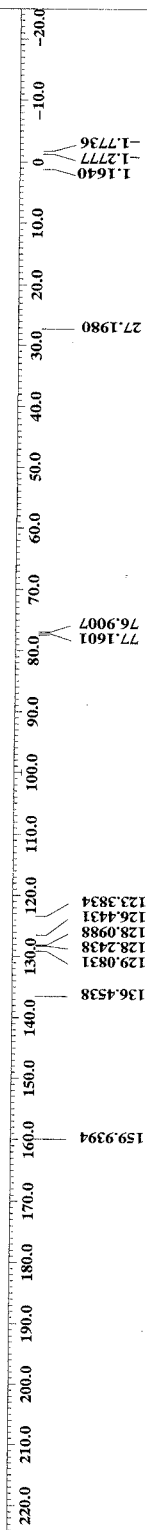

X : parts per Million : 13C



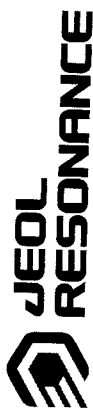

File Name = C:\Users\delta\Documents\3  
 Author = delta  
 Experiment = proton\_1-4  
 Sample Id = ester  
 Solvent = CHLOROFORM-D  
 Creation Time = 18-MAR-2013 13:57:42  
 Revision Time = 18-MAR-2013 13:57:10  
 Current Time = 18-MAR-2013 13:57:21  
 Comment = single pulse  
 Data Format = ID COMEXX  
 Dim Size = 13107  
 Dim Title = Proton  
 Dim Units = [ppm]  
 Dimensions = X  
 Site = 004-PCS400  
 Spectrometer = DPX400\_NMR  
 Field Strength = 9.42499681[T] (400[Mhz])  
 X\_Acq\_Duration = 2.1757952[s]  
 X\_Domain = 1H  
 X\_Freq = 401.28219856[Mhz]  
 X\_Offset = 1.0584  
 X\_Points = 1  
 X\_Prescans = 0.45960208[Hz]  
 X\_Resolution = 7.53012048[kHz]  
 X\_Sweep\_Clip = 6.02409639[kHz]  
 X\_Sweep\_Domain = Proton  
 X\_Sweep\_Freq = 401.28219856[Mhz]  
 X\_Sweep\_Offset = 5[ppm]  
 X\_Sweep\_Points = 1  
 X\_Sweep\_Tri\_Domain = 401.28219856[Mhz]  
 X\_Sweep\_Tri\_Freq = 401.28219856[Mhz]  
 X\_Sweep\_Tri\_Offset = 5[ppm]  
 X\_Sweep\_Tri\_Points = FALSE  
 X\_Sweep\_Tri\_Scans = 8  
 X\_Sweep\_Tri\_Total\_Scans = 8  
 Relaxation\_Delay = 5[s]  
 Recv\_Gain = 56  
 Temp\_Cet = 20.6[dc]  
 X\_90\_Width = 9.25[us]  
 X\_Acq\_Time = 2.1757952[s]  
 X\_Angle = 45[deg]  
 X\_Acquisition = 0.8[db]  
 X\_Pulse = 4.025[us]  
 X\_Pulse\_Mode = Off  
 X\_Pulse\_Tri\_Mode = Off  
 X\_Pulse\_Tri\_Presat = FALSE  
 Initial Wait = 1[s]  
 Repetition Time = 7.1757952[s]

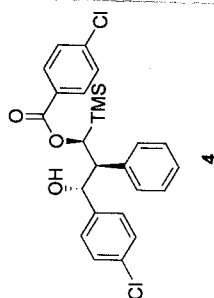

8.466

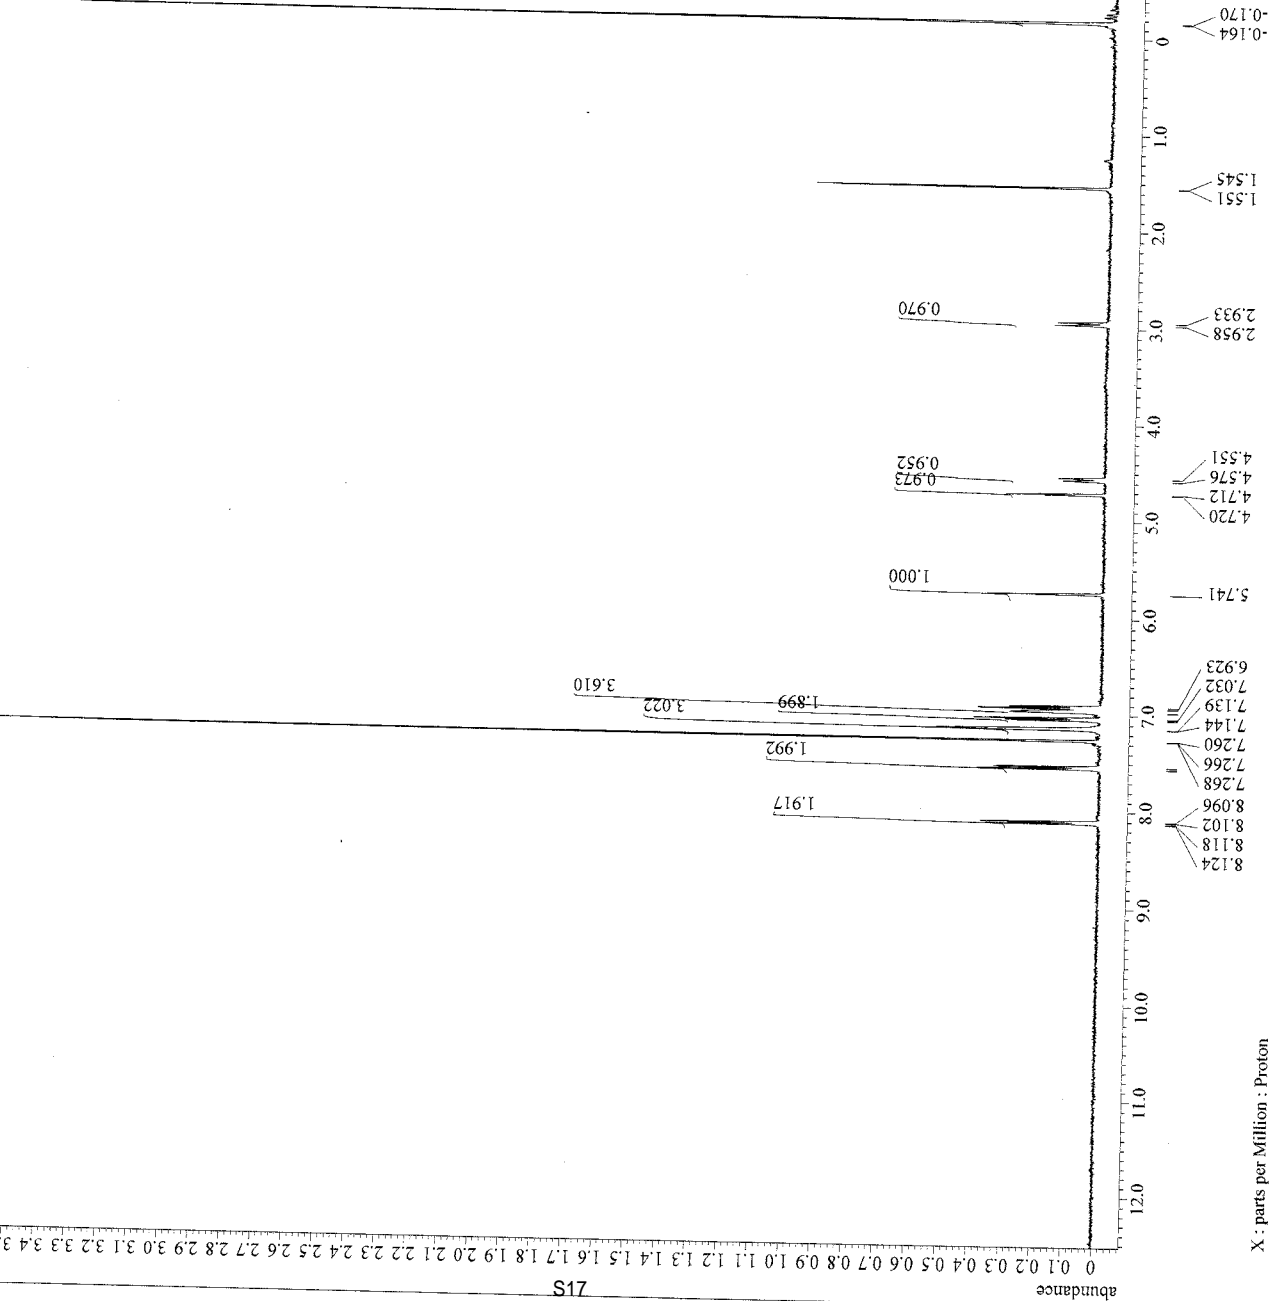

217

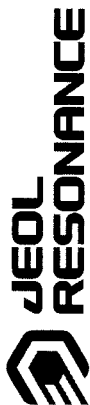

|                  |                                                                        |
|------------------|------------------------------------------------------------------------|
| FileNames        | = C:\Users\dalra\Documents\A                                           |
| Author           | = delta                                                                |
| Experiment       | = carbon_jsp                                                           |
| Sample_Id        | = tt-bd-130-hplc-1-2-C                                                 |
| Solvent          | = CHLOROFORM-D                                                         |
| Creation_Time    | = 11-MAR-2013 11:05:18                                                 |
| Revision_Time    | = 12-MAR-2013 18:27:21                                                 |
| Current_Time     | = 12-MAR-2013 18:27:21                                                 |
| Comment          | = single pulse decoupled gat                                           |
| Data_Format      | = 1D COMPLEX                                                           |
| Dim Size         | = 76214                                                                |
| Dim Title        | = Carbon13                                                             |
| Dim Units        | = [ppm]                                                                |
| Dimensions       | X = 100[ppm]<br>Y = 100[ppm]<br>Z = 100[ppm]                           |
| SpecName         | = X-MG-PCS400                                                          |
| Spectrometer     | = DELTA2_NMR                                                           |
| Field Strength   | = 9.42499681[T] (400[MHz])                                             |
| Acq Duration     | = 1.03809024[s]                                                        |
| X Domain         | = 13C<br>= 100.90247863[MHz]<br>= 100[ppm]<br>= 100[ppm]<br>= 4<br>= 4 |
| X Freq           | = 0.96330739[Bz]                                                       |
| X Offset         | = 31.5655657[Bz]                                                       |
| X Prescan        | = 25.25252525[kHz]                                                     |
| X Resolution     | = Proton                                                               |
| X Sweep          | = 401.28219856[MHz]                                                    |
| X Sweep_Clippped | = 51[ppm]<br>= 25.25252525[kHz]<br>= 256                               |
| Irr Freq         | = 401.28219856[MHz]                                                    |
| Irr Domain       | = Proton                                                               |
| Irr Onset        | = 51[ppm]                                                              |
| Acq'd Time       | = 256                                                                  |
| Total_Scans      | = 256                                                                  |
| Relaxation_Delay | = 2[s]                                                                 |
| Recovr Gain      | = 50                                                                   |
| Temp             | = 20.5[degC]                                                           |
| X_90_Width       | = 8.75[us]                                                             |
| Acq Time         | = 30.6809024[s]                                                        |
| Noise            | = 5.2[dB]                                                              |
| X Att            | = 2.91666667[us]                                                       |
| X Pulse          | = 22.691[dB]                                                           |
| Irr Att Dec      | = 22.691[dB]                                                           |
| Irr Att          | = 22.691[dB]                                                           |
| Irr Noise        | = WALTZ                                                                |
| Irr Width        | = 0.115[msec]                                                          |
| Decoupling       | = WALTZ                                                                |
| Dithing          | = 11.1[us]                                                             |
| Initial_Wait     | = 7008                                                                 |
| Noe Time         | = 7008                                                                 |
| Repetition Time  | = 3.03809024[s]                                                        |

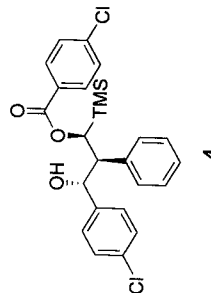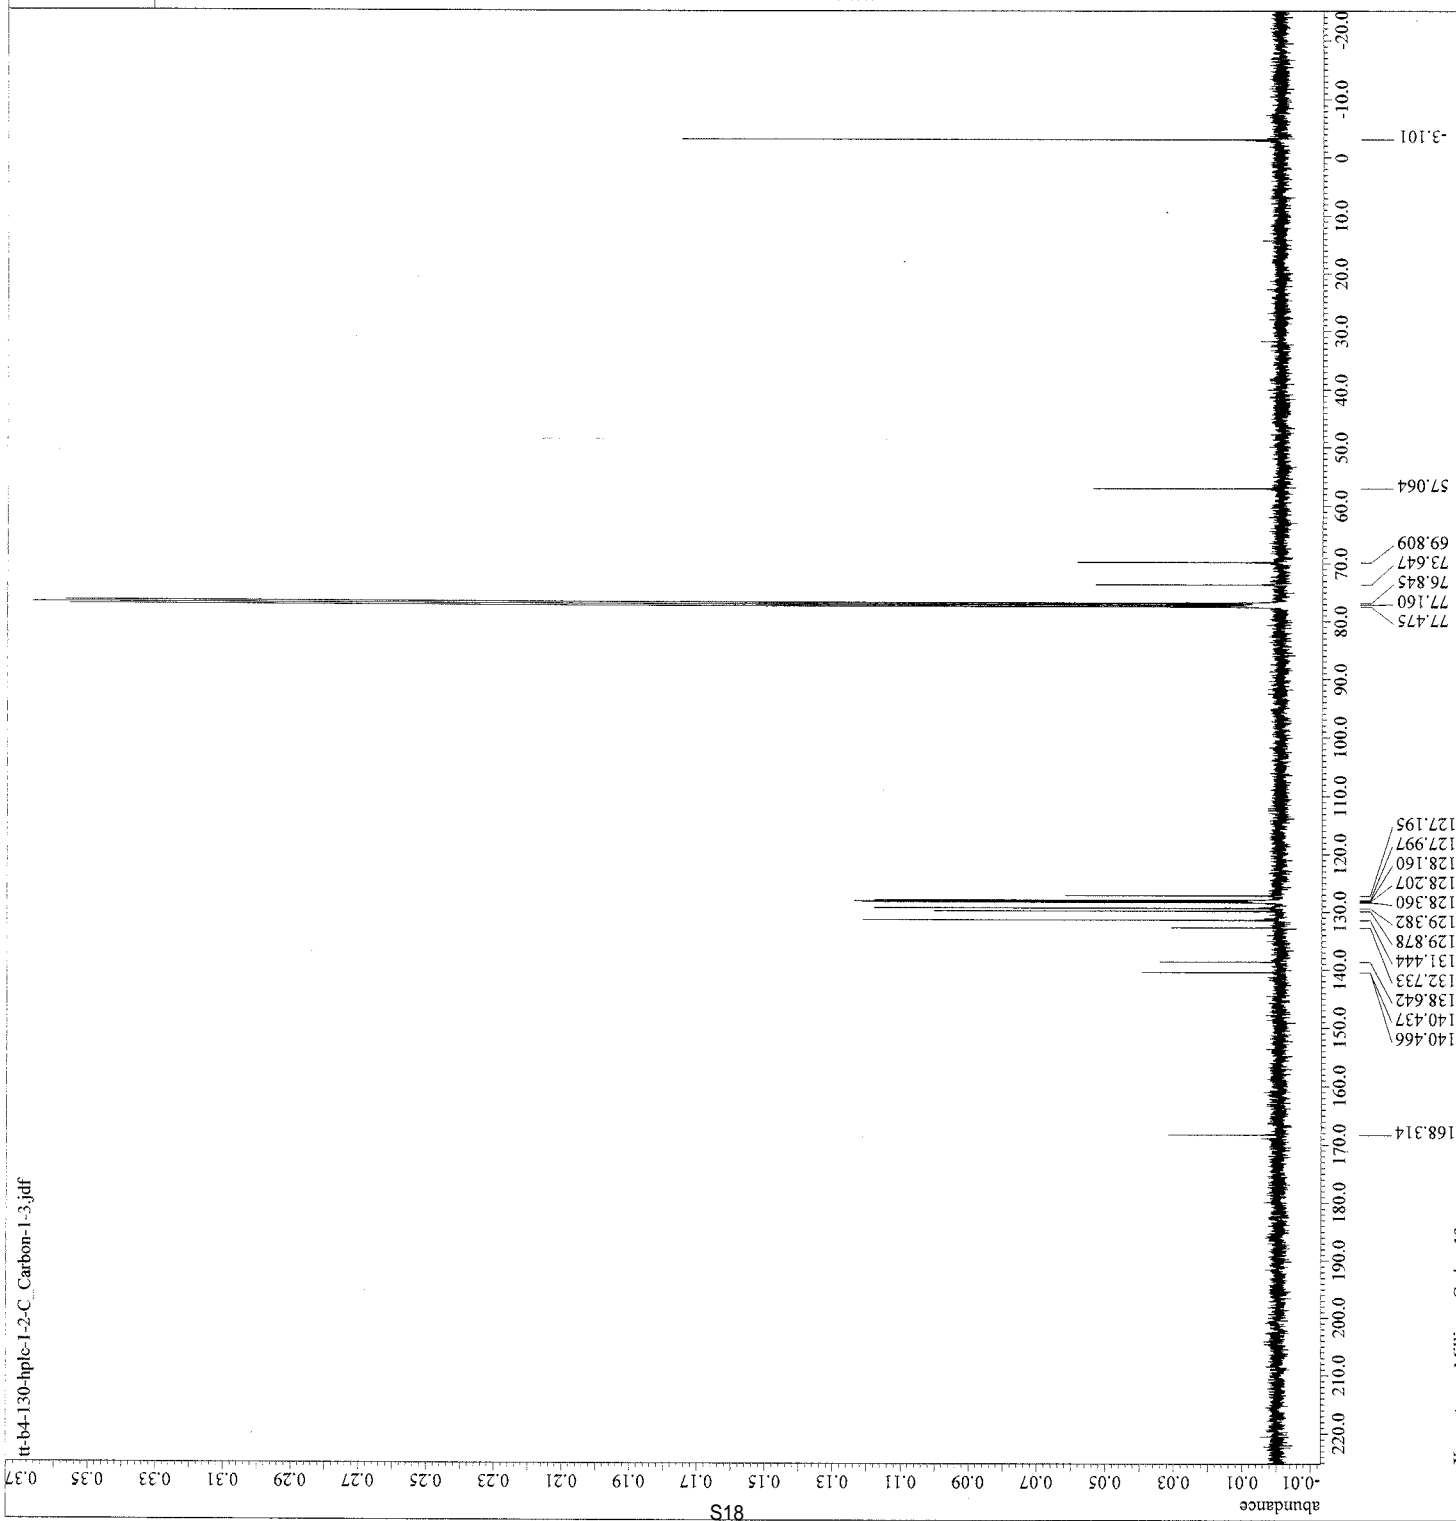

X : parts per Million : Carbon13

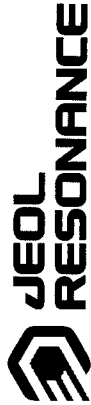

Filename = tt-ml-53-hplc\_Proton-1-4.j  
 Author = delta  
 Experiment = proton\_jxp  
 Sample Id = tt-ml-53-hplc  
 Solvent = CHLOROFORM-D  
 Creation\_Time = 26-AUG-2013 11:55:17  
 Revision\_Time = 26-AUG-2014 18:58:37  
 Current\_Time = 26-AUG-2014 19:02:26  
 Comment = single pulse  
 Data Format = 1D COMPLEX  
 Dim Size = 13107  
 Dim Title = Proton  
 Dim Units = [ppm]  
 Dimensions = 1  
 Name = RM-RS2400  
 Spectrometer = DELTA2\_NMR  
 Field Strength = 9.42499681[T] (400[Mhz])  
 X\_Acq\_Duration = 2.1757952[s]  
 X\_Domain = 1H  
 X\_Freq = 401.28219856[Mhz]  
 X\_Offset = 1.6384  
 X\_Prescans = 1  
 X\_Resolution = 0.45960208[Hz]  
 X\_Sweep = 7.53012048[Hz]  
 X\_Sweep\_Clip = 6.02409639[Mhz]  
 Irq\_Domain = Proton  
 Irq\_Freq = 401.28219856[Mhz]  
 Irq\_Offset = 5.1111  
 Irq\_Prescans = 5  
 Tri\_Domain = Proton  
 Tri\_Freq = 401.28219856[Mhz]  
 Tri\_Offset = 5[ppm]  
 Clipped = FALSE  
 Scans = 8  
 Total\_Scans = 8  
 Relaxation\_Delay = 5[s]  
 Recvr Gain = 42  
 Temp\_Get = 21.6[degC]  
 X\_90\_Width = 9.25[us]  
 X\_Acq\_Time = 2.1757952[s]  
 X\_Angle = 45[deg]  
 X\_Cycle = 1  
 X\_Pulse = 4.625[us]  
 Irq\_Mode = Off  
 Tri\_Mode = Off  
 Dante\_Preset = FALSE  
 Initial\_Wait = 1[s]  
 Repetition\_Time = 7.1757952[s]

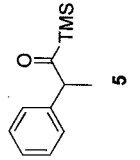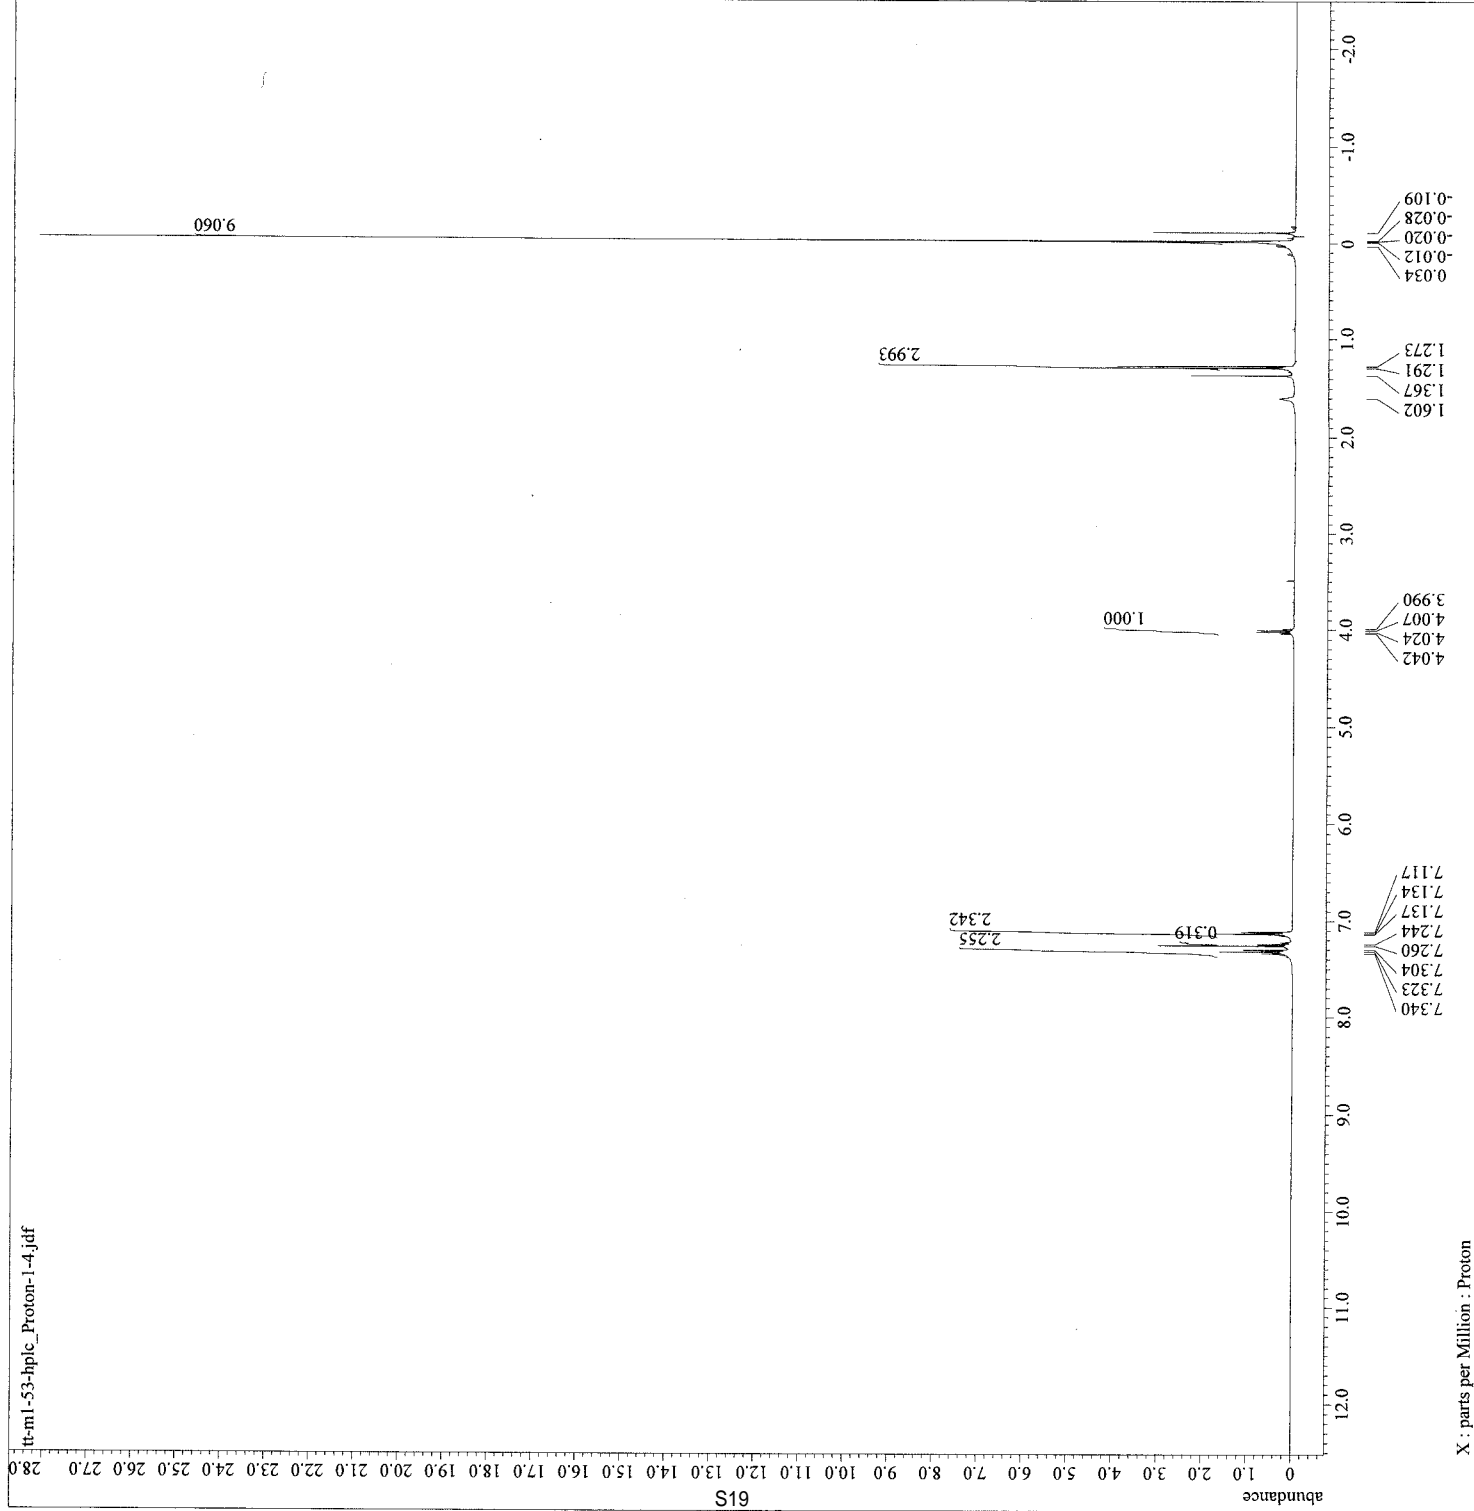

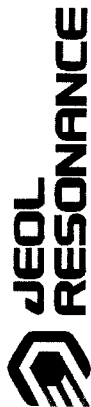

Filename = \\Users\delta\Documents\JEO  
 Author = delta  
 Experiment = carbon\_jpp  
 Sample\_Id = tt-m1-53-hplc\_C  
 Solvent = CHLOROFORM-D  
 Creation\_Time = 26-AUG-2013 12:02:15  
 Revision\_Time = 26-AUG-2013 13:04:06  
 Current\_Time = 26-AUG-2013 13:04:52  
 Comment = single pulse decoupled gat  
 Data\_Format = 1D COMEXX  
 Dia\_Size = 26214  
 Dia\_Title = Carbon13  
 Dia\_Units = [ppm]  
 Dimensions = X  
 Site = JNM-EC5400  
 Spectrometer = DELTA2\_MK2  
 Field\_Strength = 9.42499681[T] (400 [MHz])  
 X\_Acq\_Duration = 0.92798976[s]  
 X\_Domain = 13C  
 X\_Freq = 100.62647663 [MHz]  
 X\_Offset = 130.1 [ppm]  
 X\_Points = 32768  
 X\_Frescan = 4  
 X\_Resolution = 1.0775981 [Hz]  
 X\_Sweep = 35.31073446 [kHz]  
 X\_Sweep\_Clipped = 28.24858757 [kHz]  
 X\_Domain = Proton  
 Xir\_Freq = 401.28219856 [MHz]  
 Xir\_Offset = 5 [ppm]  
 Xir\_Clipped = FALSE  
 Scans = 256  
 Total\_Scans = 256  
 Relaxation\_Delay = 2[s]  
 Recvr\_Gain = 50  
 Temp\_Get = 21.9 [deg]  
 X\_P0\_Width = 8.75 [us]  
 X\_Acq\_Time = 0.92798976[s]  
 X\_Pulse = 20 [deg]  
 X\_Atr = 2.91666667 [us]  
 Xir\_Atr\_Dec = 22.691 [ns]  
 Xir\_Atr\_Noe = 22.691 [ns]  
 Xir\_Noise = WALTZ  
 Xir\_Fwidth = 0.115 [ms]  
 Decoupling = TRUE  
 Initial\_Wait = 1[s]  
 Noe = TRUE  
 Noe\_Time = 2[s]  
 Repetition\_Time = 2.92798976[s]

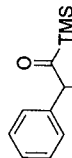

5

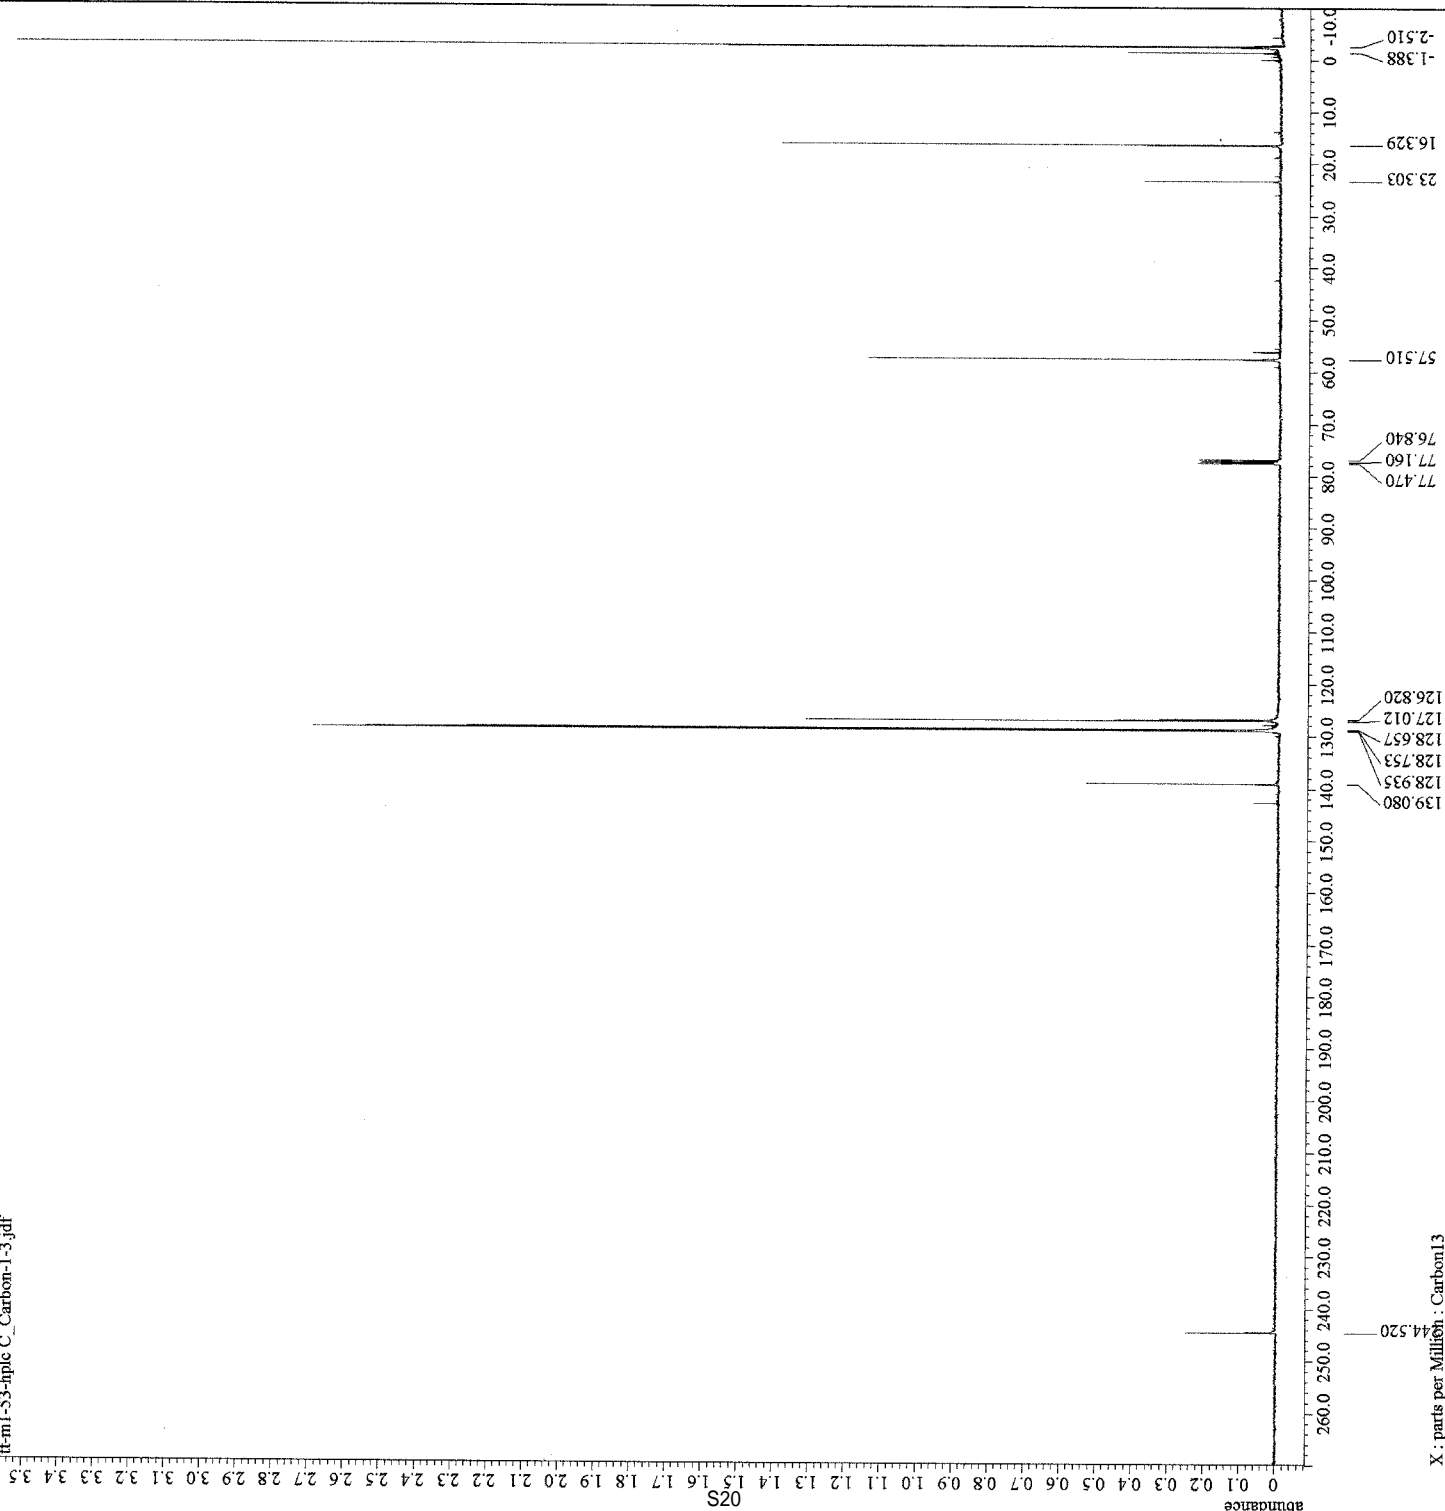

```

===== ACQUISITION PARAMETERS =====
File Name      = 1d_spectrum.235
Author
Sample ID      = tc-ml-58-distillate
Content        = Single Pulse Experiment
Creation Date   = 29-AUG-2013 14:14:45
Revision Date  = 1-SEP-2013 22:19:27
Spec Site      = ECF5050
Soc Type       = DELTA NMR
Data Format     = 1D COMPLEX
Dimensions     = 1
Dim 1 title    = X
Dim 1 size     = 18384
Dim 2 title    = 13C
Dim 2 size     = 8
Dim 3 title    = Scans
Dim 3 size     = 1
Mod return     = 1
X domain        = 1H
X offset        = 5 [ppm]
X sweep         = 7.50750750 [MHz]
X resolution    = 7.50750751 [kHz]
X solvent       = CHLOROFORM-D
X spin.get      = 15 [Hz]
X proc.get      = 465 [G]
Y domain        = 1H
Y offset        = 5 [ppm]
Y sweep         = 7.50750750 [MHz]
Y resolution    = 7.50750751 [kHz]
Y solvent       = CHLOROFORM-D
Y spin.get      = 15 [Hz]
Y proc.get      = 465 [G]
Field strength  = 11.7473579 [T]
Filter mode     = BUTTERWORTH
Filter width    = 3.75119936 [MHz]
=====

```

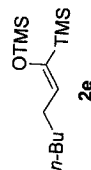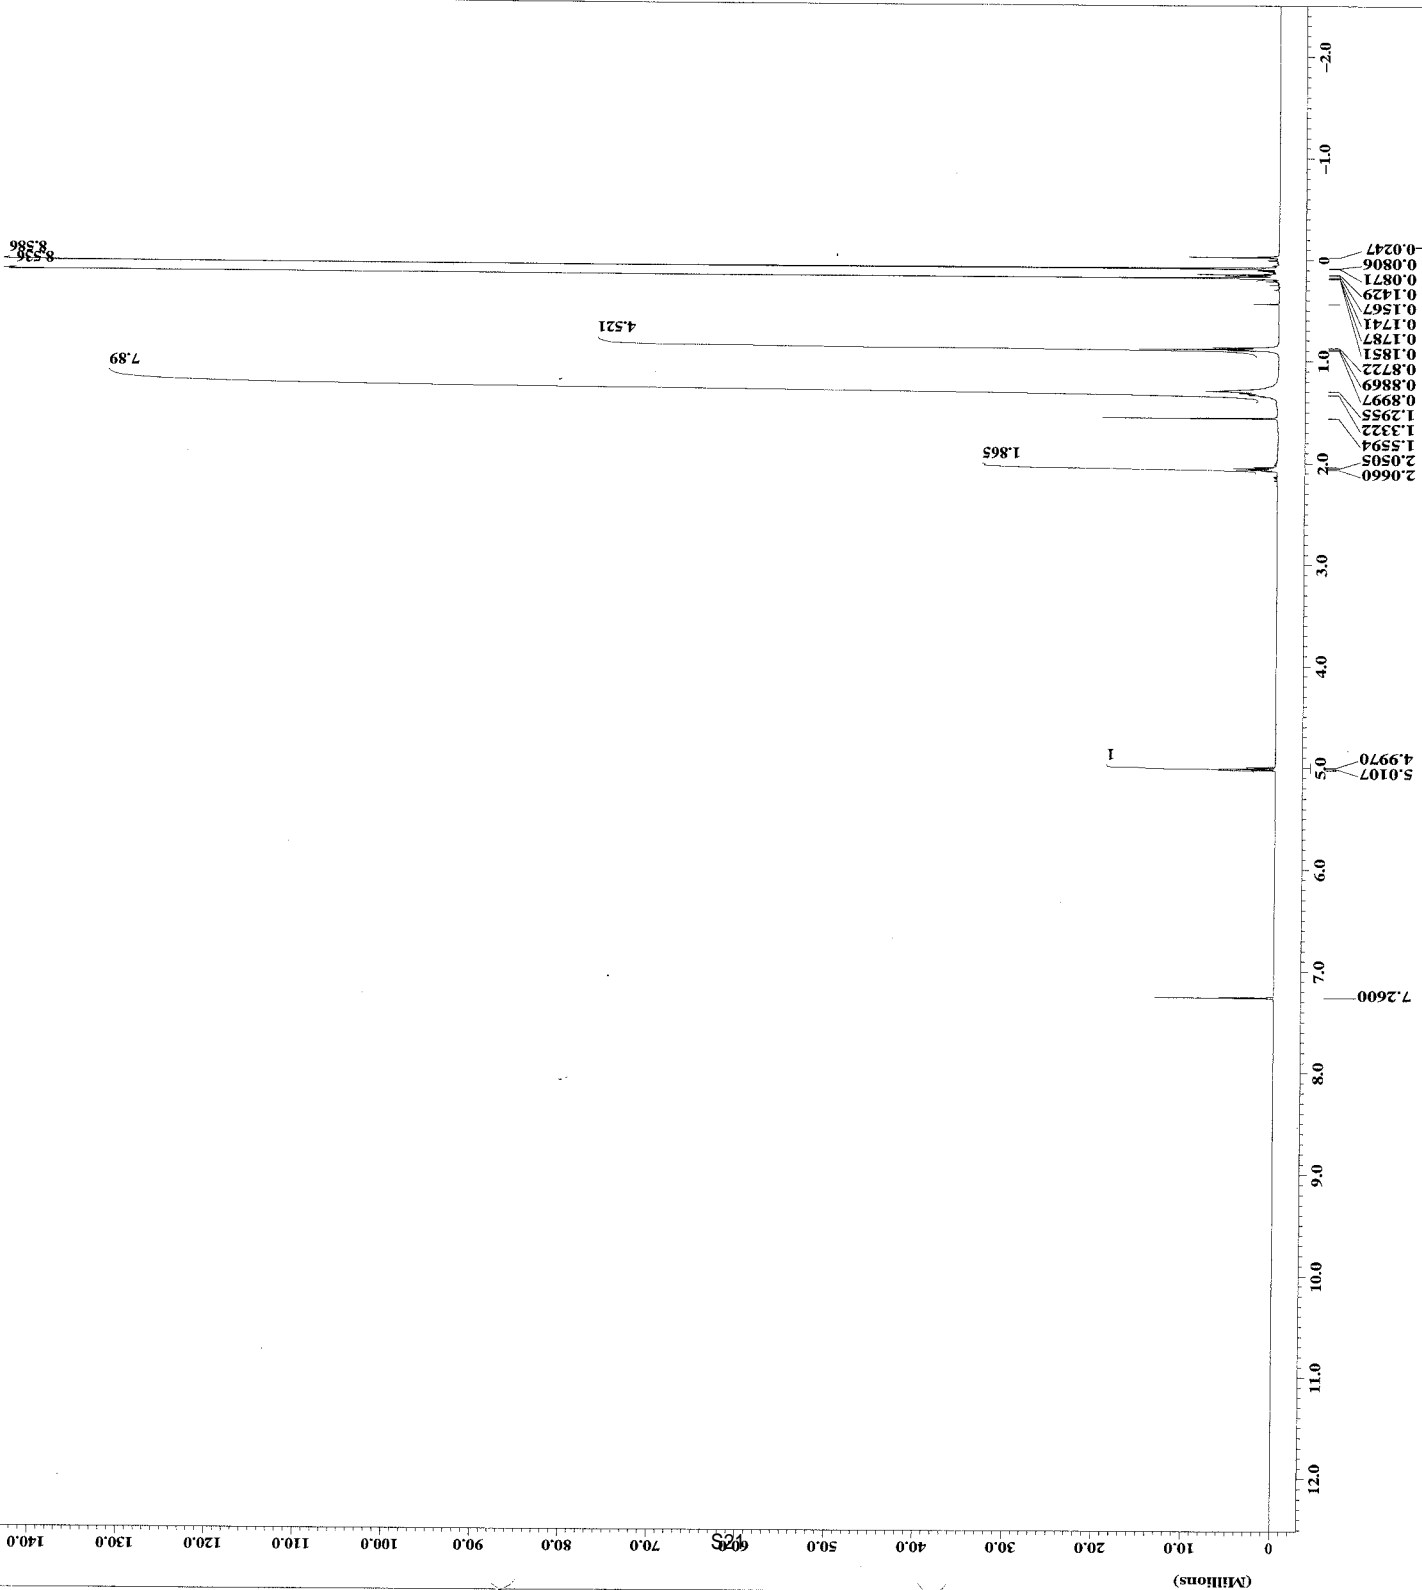

**X : parts per Million : 1H**

Filename = Users\delta\Documents\JEO  
 File = delta  
 Experiment = tt-b4-151-fr.2-3  
 Sample Id = CHELOFORM-D  
 Solvent = 14-MAR-2013 23:17:32  
 Revision Time = 15-MAR-2013 00:01:11  
 Current Time = 15-MAR-2013 00:01:20  
 Comment = single pulse decoupled gat  
 Data Format = ID\_CPMZEX  
 Dim Size = 26214  
 Dim Title = Carbon13  
 Dim Units = [ppm]  
 Dimensions = X  
 Site = JNM-SCS400  
 Spectrometer = DELTA2\_NMR  
 Field Strength = 9.42499681[T] (400[MHz])  
 X Acq Duration = 1.03809024[s]  
 X Domain = 13C  
 X Freq = 100.90247863[MHz]  
 X Offset = 100[ppm]  
 X Points = 32768  
 X Resolution = 0.96330739[Hz]  
 X Sweep = 31.56565657[KHz]  
 X Sweep Clipped = 25.25252525[KHz]  
 Irr Domain = Proton  
 Irr Freq = 401.28219856[MHz]  
 Irr Offset = 5[ppm]  
 Clipped = 0.452  
 Scans = 947  
 Total Scans = 947  
 Relaxation Delay = 2[s]  
 Recvr Gain = 50  
 Temp Get = 20[dc]  
 X Acq Width = 0.75[us]  
 X Acq Time = 1.03809024[s]  
 X Angle = 30[deg]  
 X Atn = 5.2[db]  
 X Pulse = 2.91666667[us]  
 Irr Atn Dec = 22.691[db]  
 Irr Atn Noe = 22.691[db]  
 Irr Noise = WALTZ  
 Irr Power = 1.5[db]  
 Decoupling = TRUE  
 Initial Wait = 1[s]  
 Noe = TRUE  
 Noe Time = 2[s]  
 Repetition Time = 3.03809024[s]

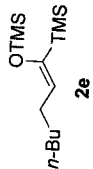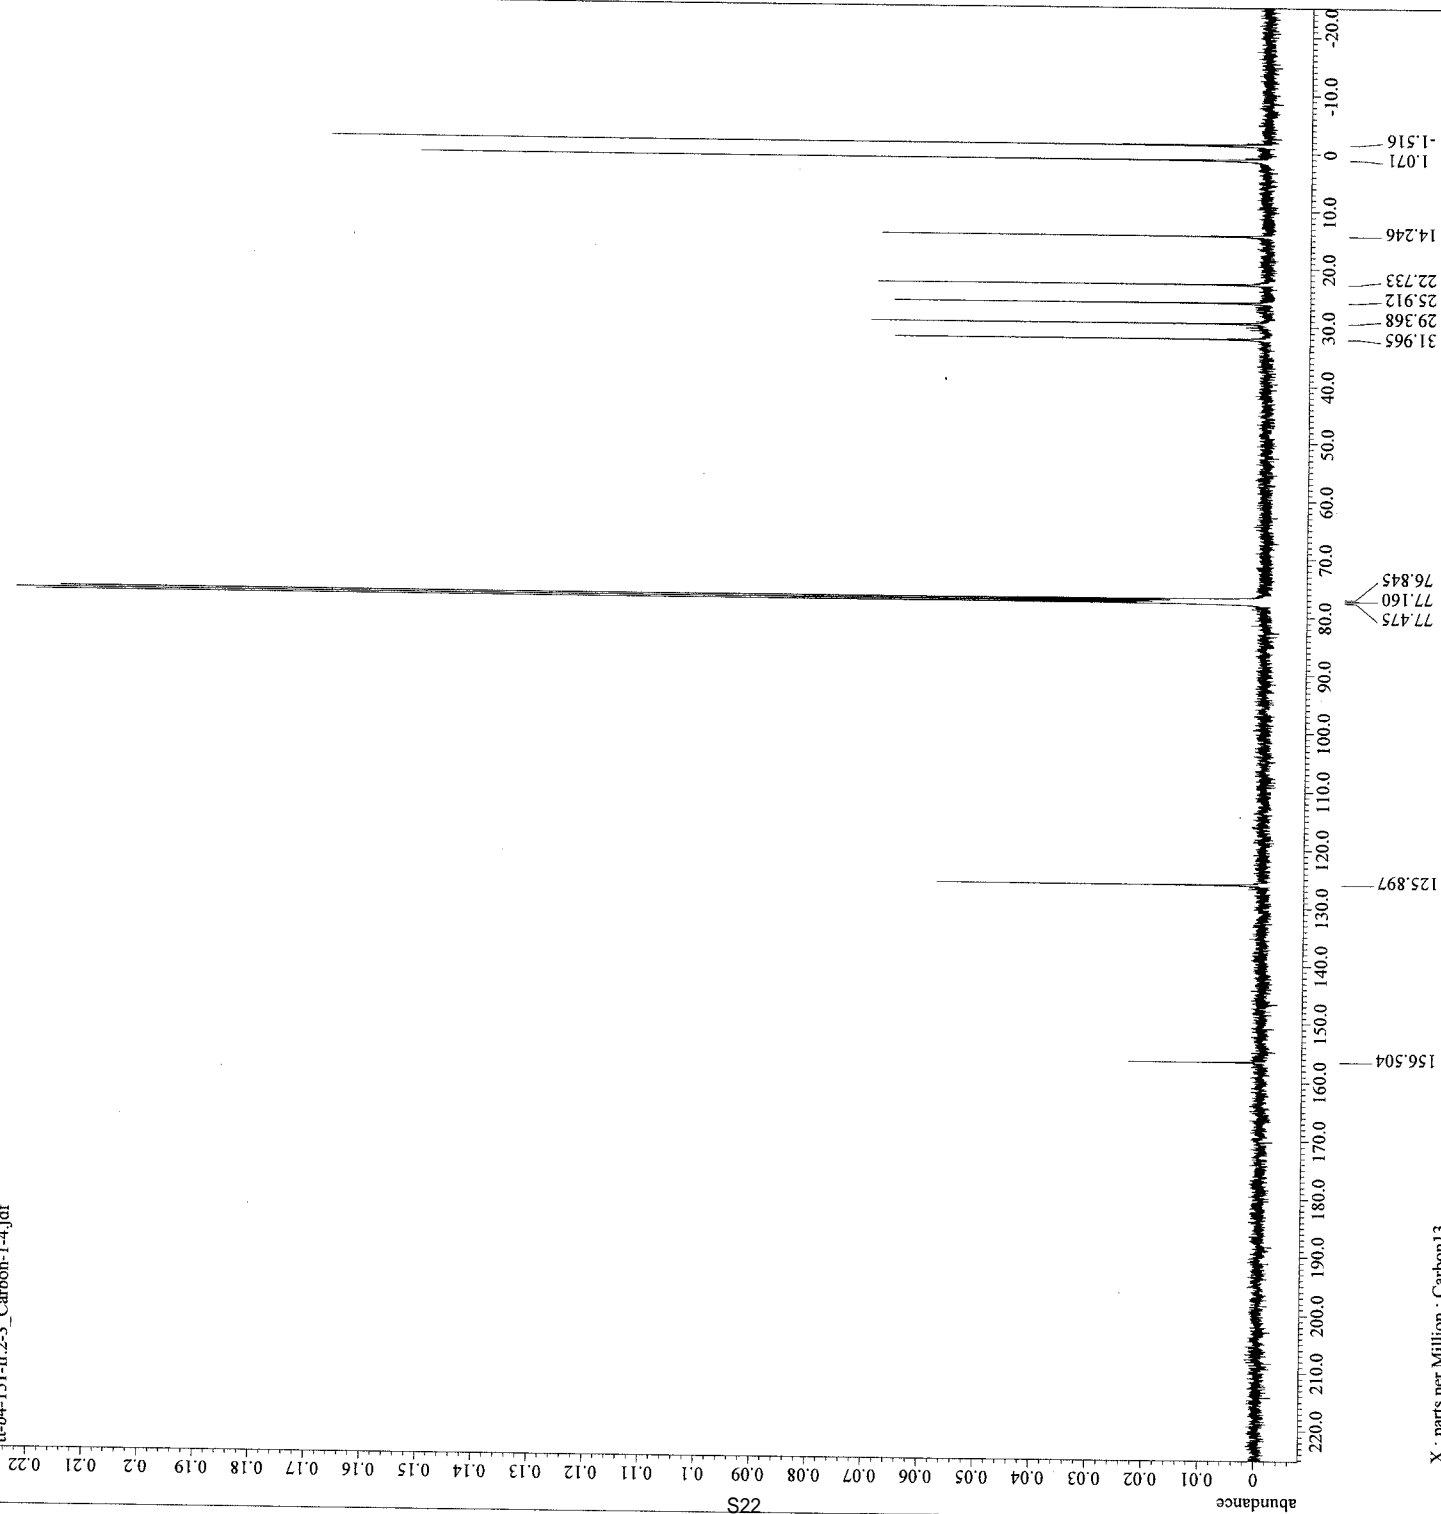

Supplement: Supplementary file 1 [file 3873922]
